# Supplementary material
Source: Royal Society of Chemistry journal article supplement (doi:10.1039/d6cp00694a)
Supplement: d6cp00694a1.pdf [file d6cp00694a1.pdf]

## Supporting Information

### Mechanistic Insights into High Performance W<sup>6+</sup>-Doped Li<sub>3</sub>YCl<sub>6</sub> Solid

#### State Electrolyte: Synergy of Vacancy and Lattice Softening

Yile Ding,<sup>‡a</sup> Ziang Ren,<sup>‡a</sup> Shihui Zou,<sup>a,d</sup> Peng Shi,<sup>b,d</sup> Huadong Yuan,<sup>a,d</sup> Jianmin Luo,<sup>a,d</sup>  
Yujing Liu,<sup>a,c</sup> Jianwei Nai,<sup>a,d</sup> Xinyong Tao<sup>a,d</sup> and Yao Wang<sup>\*a,d</sup>

a. College of Materials Science and Engineering, Zhejiang University of Technology, Hangzhou, 310014, China. wangyao@zjut.edu.cn

b. Science and Education Integration College of Energy and Carbon Neutrality, Zhejiang University of Technology, Hangzhou, 310014, China.

c. ZJUT-EXETER Joint Institute, Zhejiang University of Technology, Huzhou, 313000, China.

d. State Key Laboratory of Green Chemical Synthesis and Conversion.

<sup>‡</sup> These authors contributed equally.

\*Corresponding author: wangyao@zjut.edu.cn.

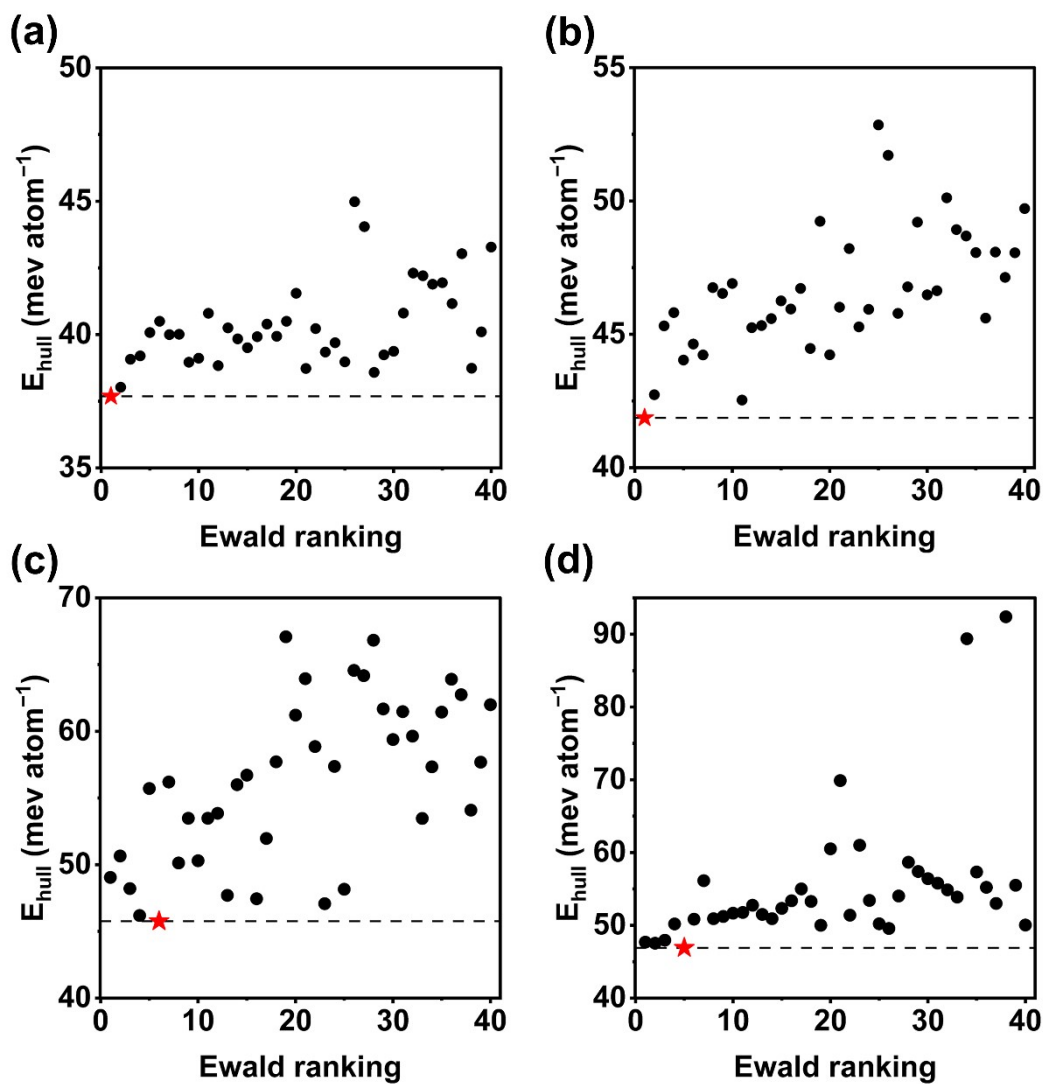

**Fig. S1**  $E_{\text{hull}}$  as a function of Ewald ranking for (a) LYWC1 (b) LYWC2 (c) LYWC3 (d) LYWC4 systems. The dashed horizontal lines represent the energy reference, and red stars indicate the most stable structures selected for further calculations.

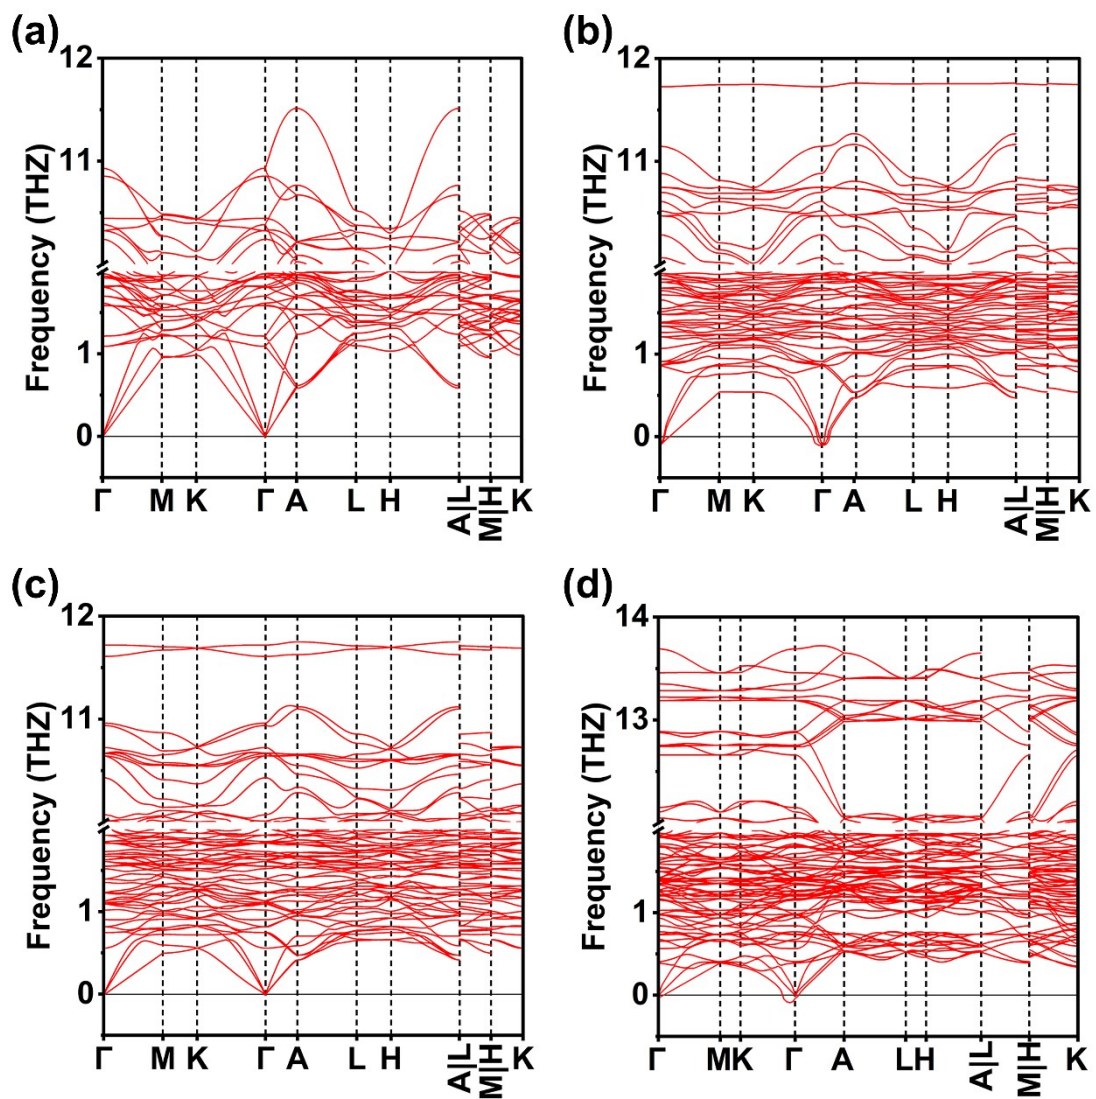

Fig. S2 The phonon dispersion spectra of (a) LYC, (b) LYWC1, (c) LYWC3, and (d) LYWC4.

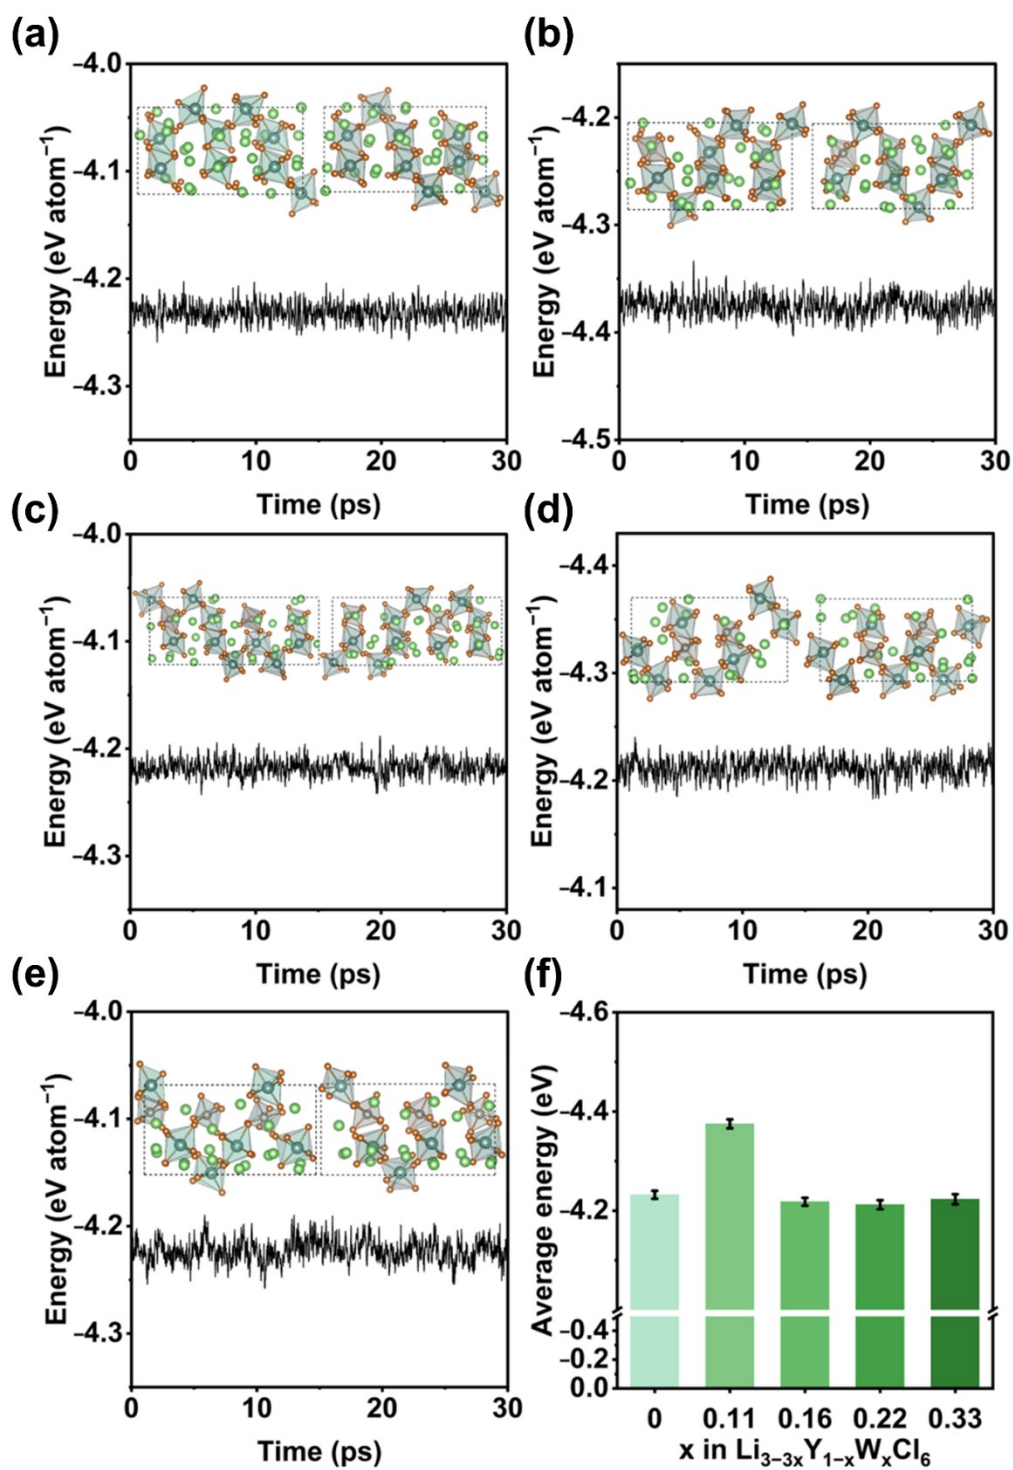

Fig. S3 Energy fluctuations (700 K AIMD) for (a) LYC, (b) LYWC1, (c) LYWC2, (d) LYWC3 and (e) LYWC4 (f) Standard deviations and error bars of the energy fluctuation.

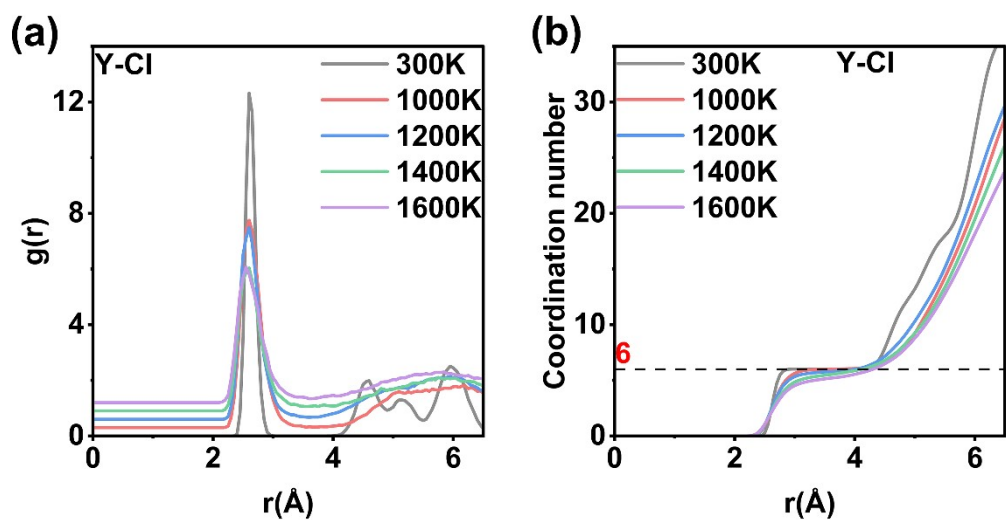

**Fig. S4** (a) The radial distribution function of Y-Cl in LYC. (b) The integral of the radial distribution function of Y-Cl in LYC.

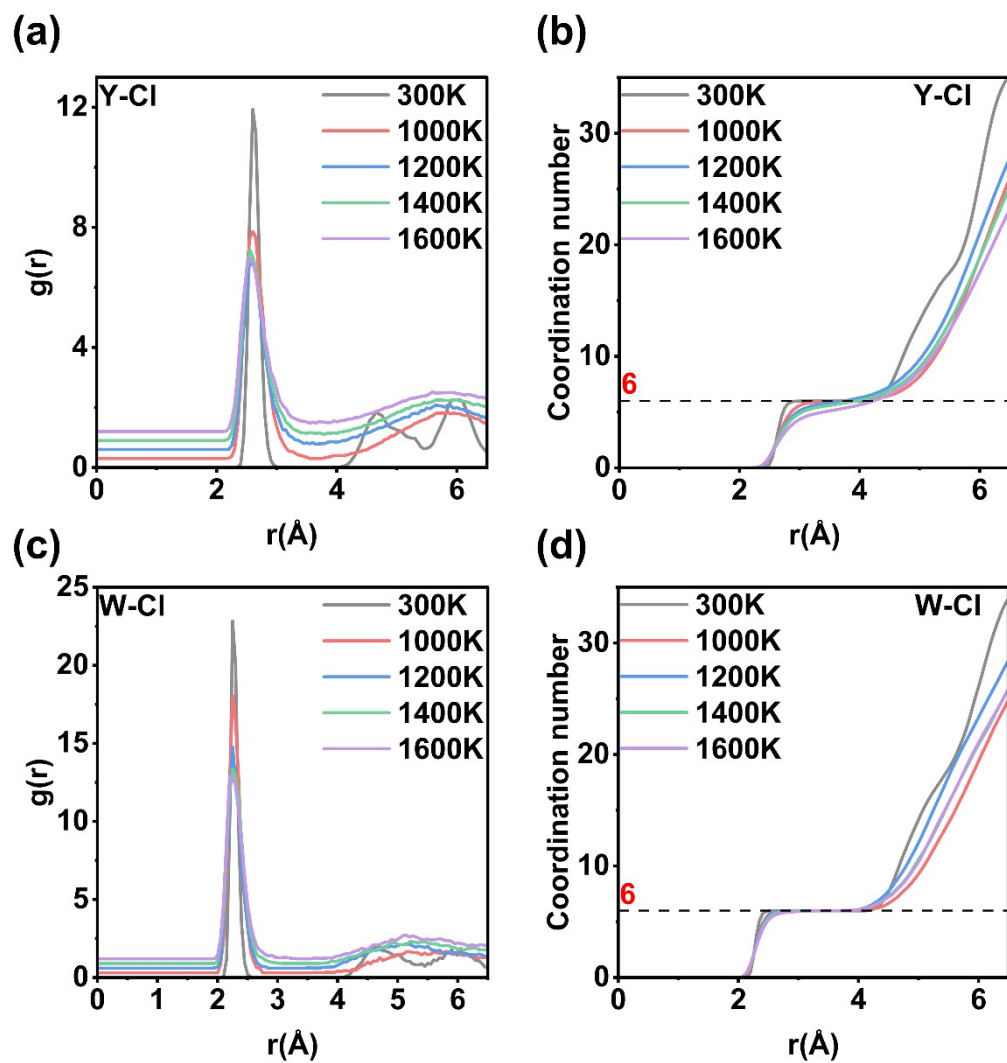

**Fig. S5** (a, b) The radial distribution function and the integral of the radial distribution function of Y-Cl, (c, d) The radial distribution function and the integral of the radial distribution function of W-Cl in LYWC1.

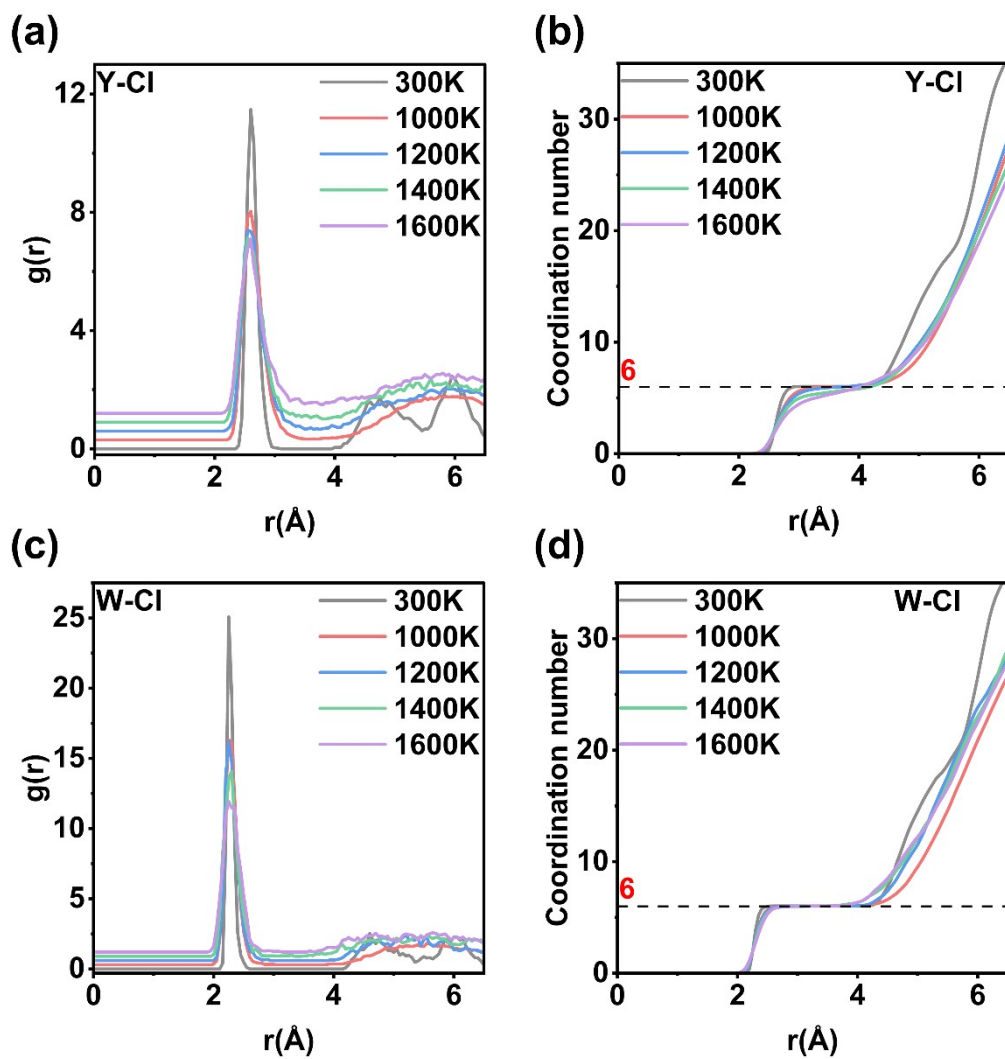

**Fig. S6** (a, b) The radial distribution function and the integral of the radial distribution function of Y-Cl, (c, d) The radial distribution function and the integral of the radial distribution function of W-Cl in LYWC2.

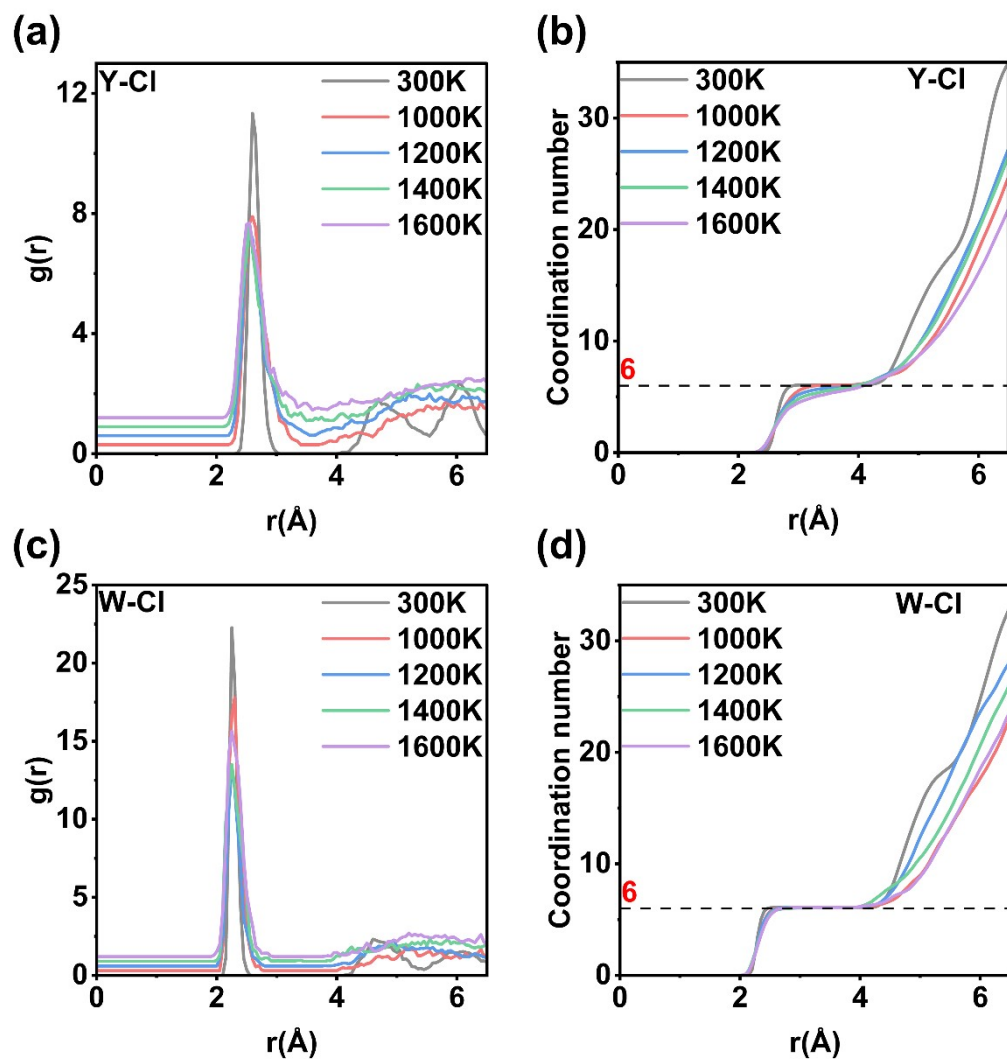

**Fig. S7** (a, b) The radial distribution function and the integral of the radial distribution function of Y-Cl, (c, d) The radial distribution function and the integral of the radial distribution function of W-Cl in LYWC3.

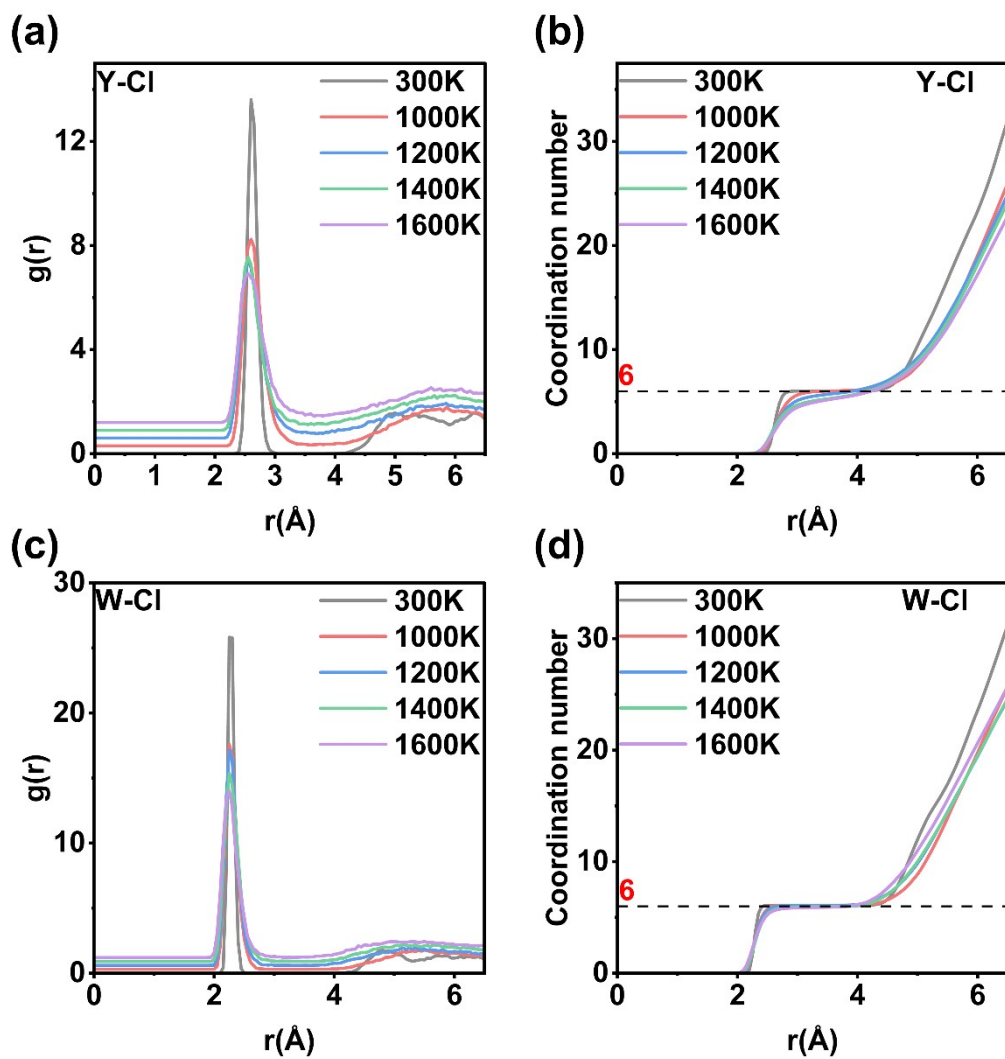

**Fig. S8** (a, b) The radial distribution function and the integral of the radial distribution function of Y-Cl, (c, d) The radial distribution function and the integral of the radial distribution function of W-Cl in LYWC4.

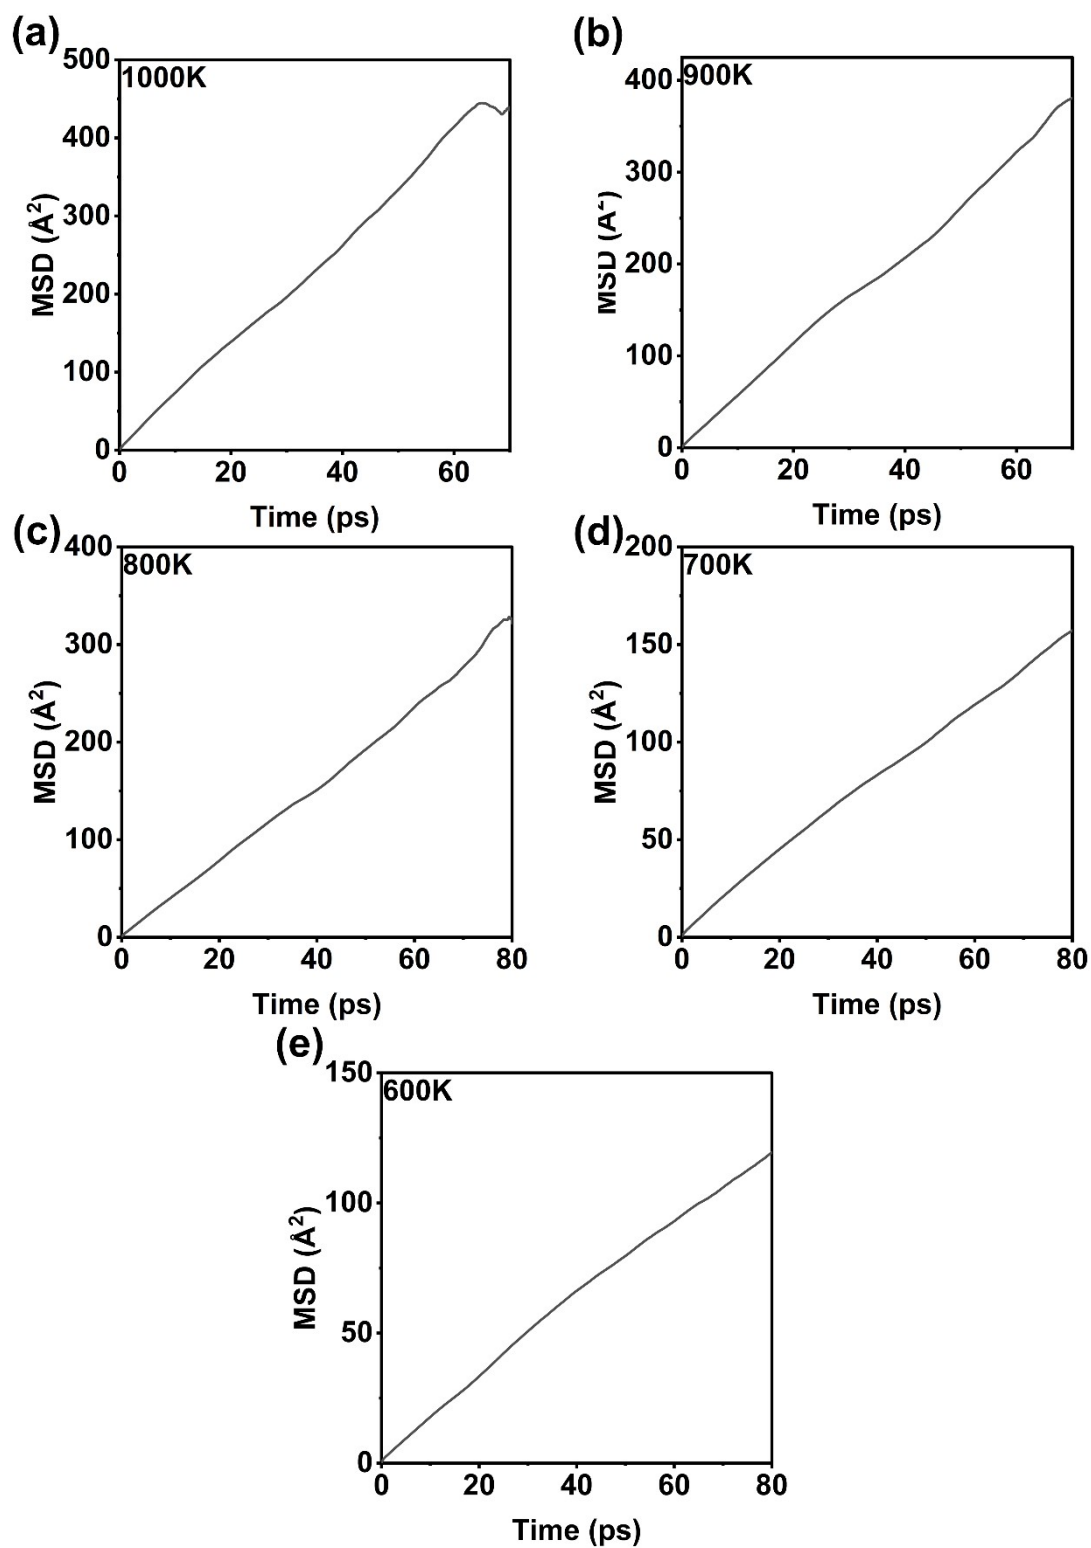

**Fig. S9**  $\text{Li}^+$  MSD plots of LYC for AIMD simulations. (a) 70ps AIMD simulation at 1000K. (b) 70ps AIMD simulation at 900K. (c) 80ps AIMD simulation at 800K. (d) 80ps AIMD simulation at 700K. (e) 80ps AIMD simulation at 600K.

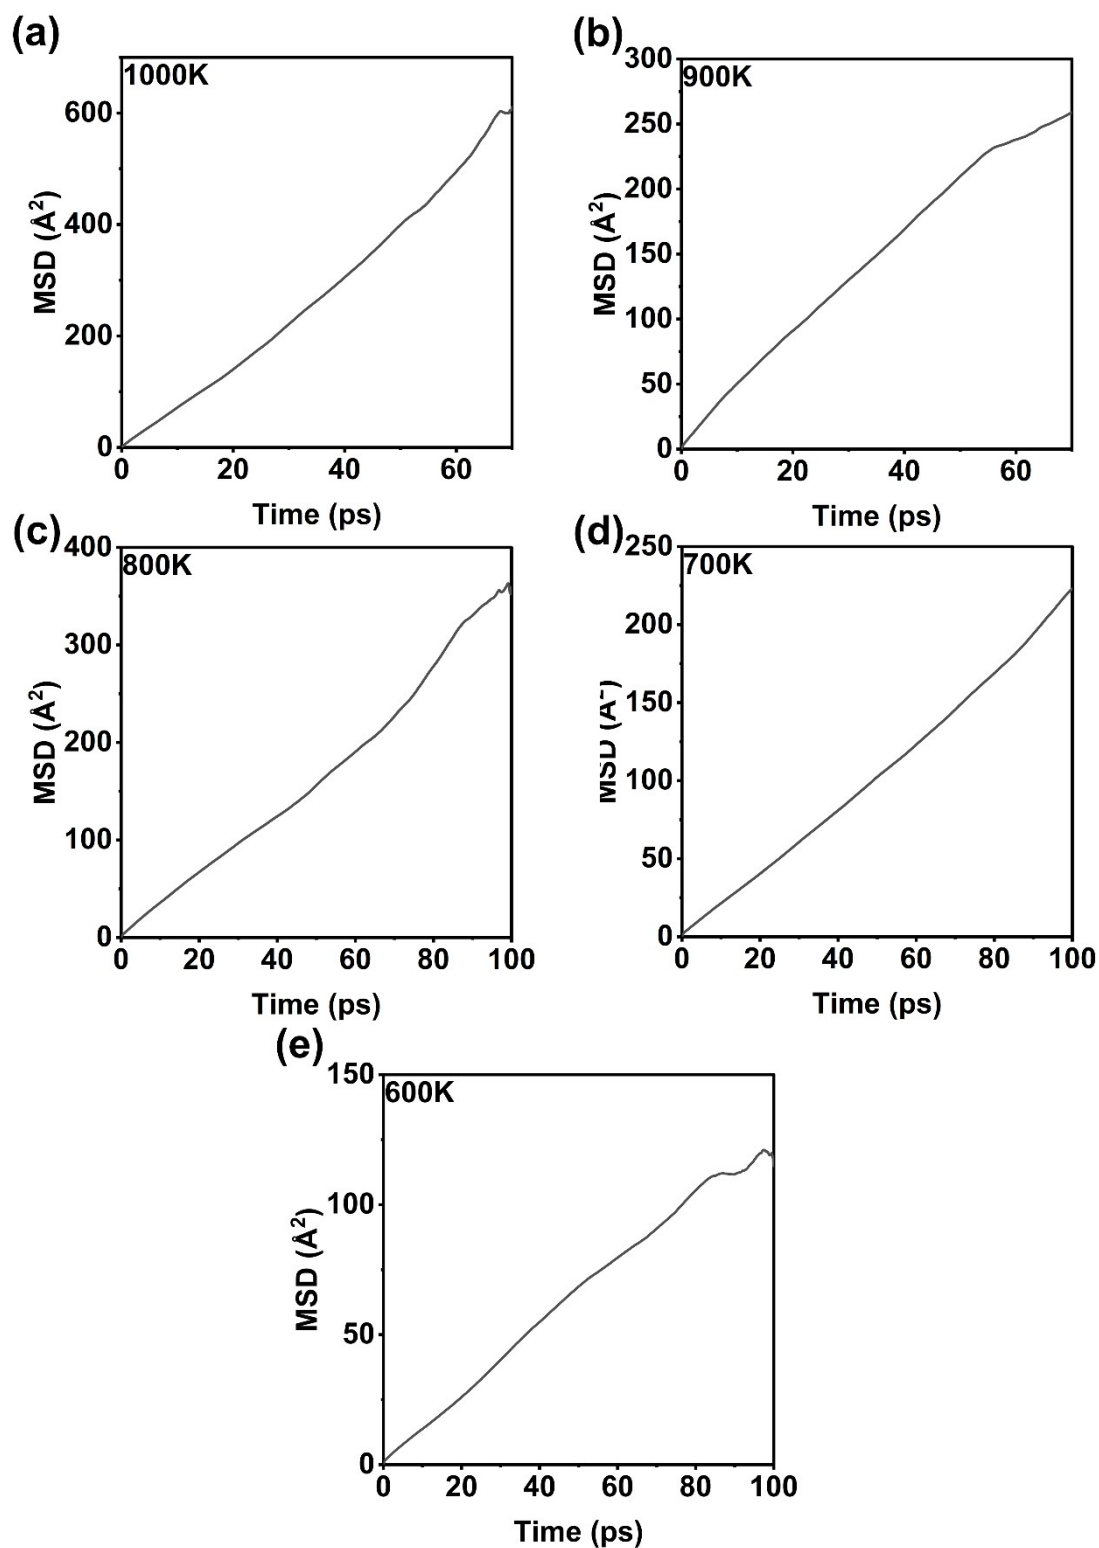

**Fig. S10**  $\text{Li}^+$  MSD plots of LYWC1 for AIMD simulations. (a) 70ps AIMD simulation at 1000K. (b) 70ps AIMD simulation at 900K. (c) 100ps AIMD simulation at 800K. (d) 100ps AIMD simulation at 700K. (e) 100ps AIMD simulation at 600K.

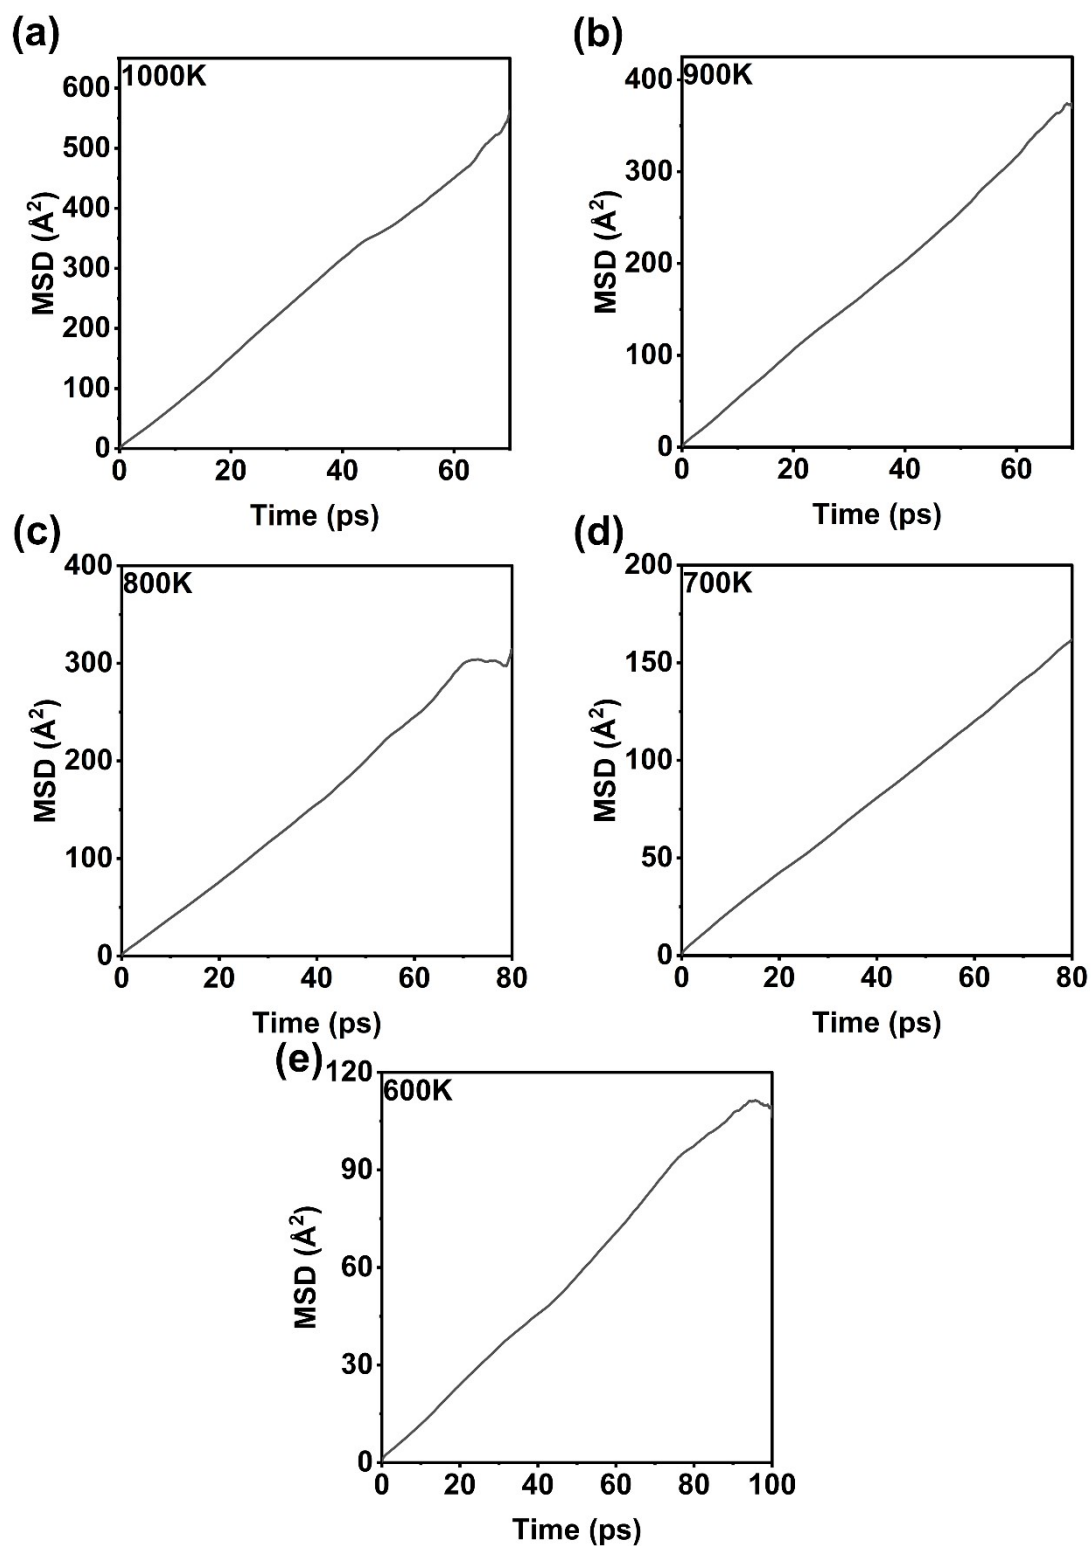

**Fig. S11**  $\text{Li}^+$  MSD plots of LYWC2 for AIMD simulations. (a) 70ps AIMD simulation at 1000K. (b) 70ps AIMD simulation at 900K. (c) 80ps AIMD simulation at 800K. (d) 80ps AIMD simulation at 700K. (e) 100ps AIMD simulation at 600K.

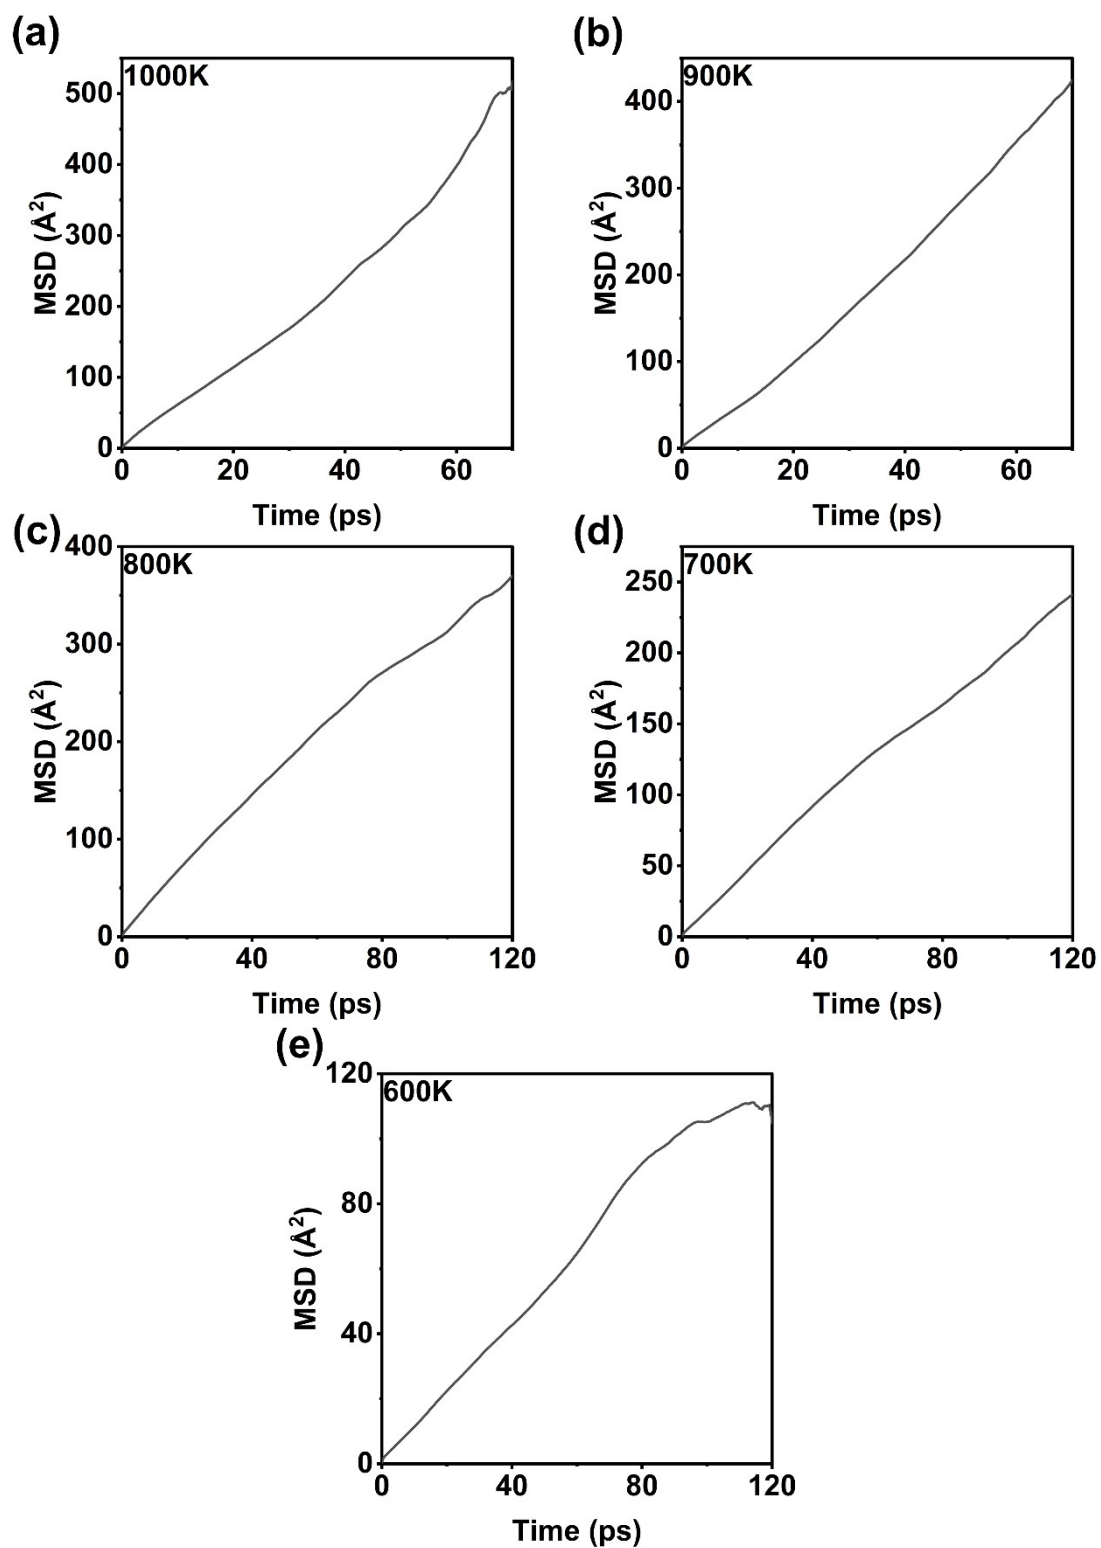

**Fig. S12**  $\text{Li}^+$  MSD plots of LYWC3 for AIMD simulations. (a) 70ps AIMD simulation at 1000K. (b) 70ps AIMD simulation at 900K. (c) 120ps AIMD simulation at 800K. (d) 120ps AIMD simulation at 700K. (e) 120ps AIMD simulation at 600K.

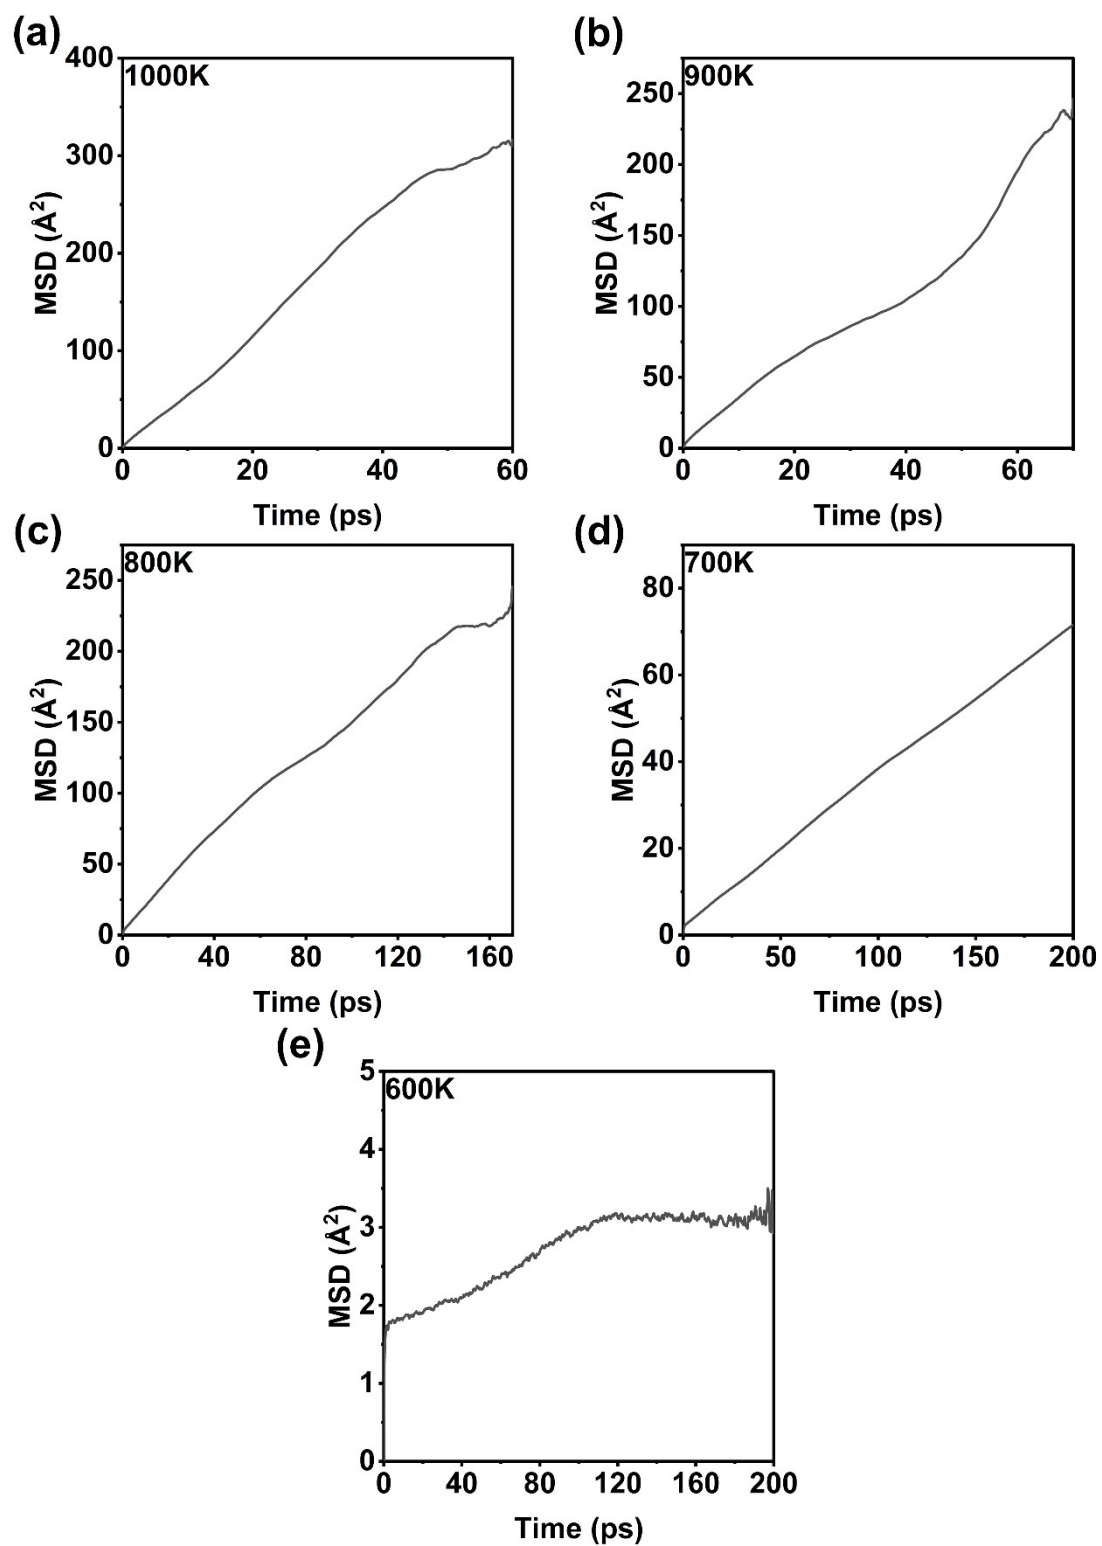

**Fig. S13**  $\text{Li}^+$  MSD plots of LYWC4 for AIMD simulations. (a) 70ps AIMD simulation at 1000K. (b) 70ps AIMD simulation at 900K. (c) 170ps AIMD simulation at 800K. (d) 200ps AIMD simulation at 700K. (e) 200ps AIMD simulation at 600K.

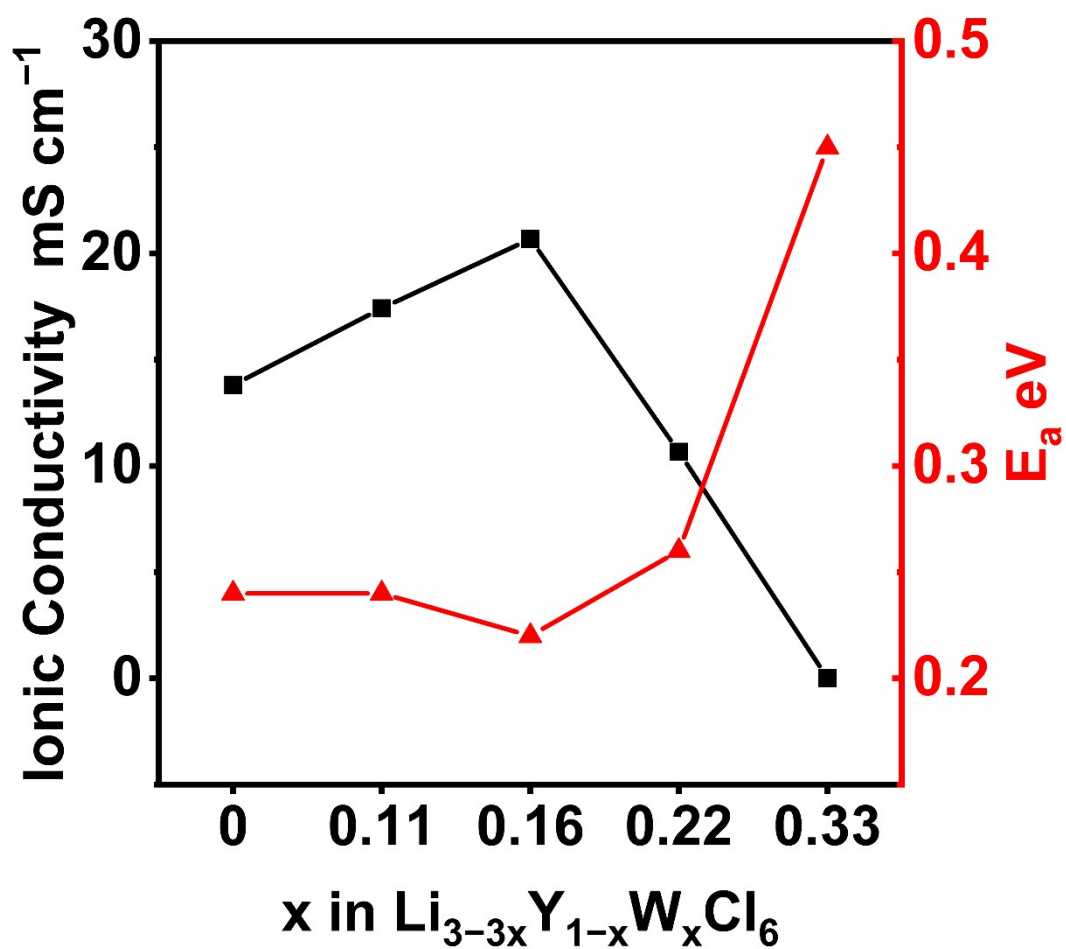

Fig. S14  $\text{Li}^+$  conductivities and activation energies for different doping structures from AIMD simulations in values at 300 K.

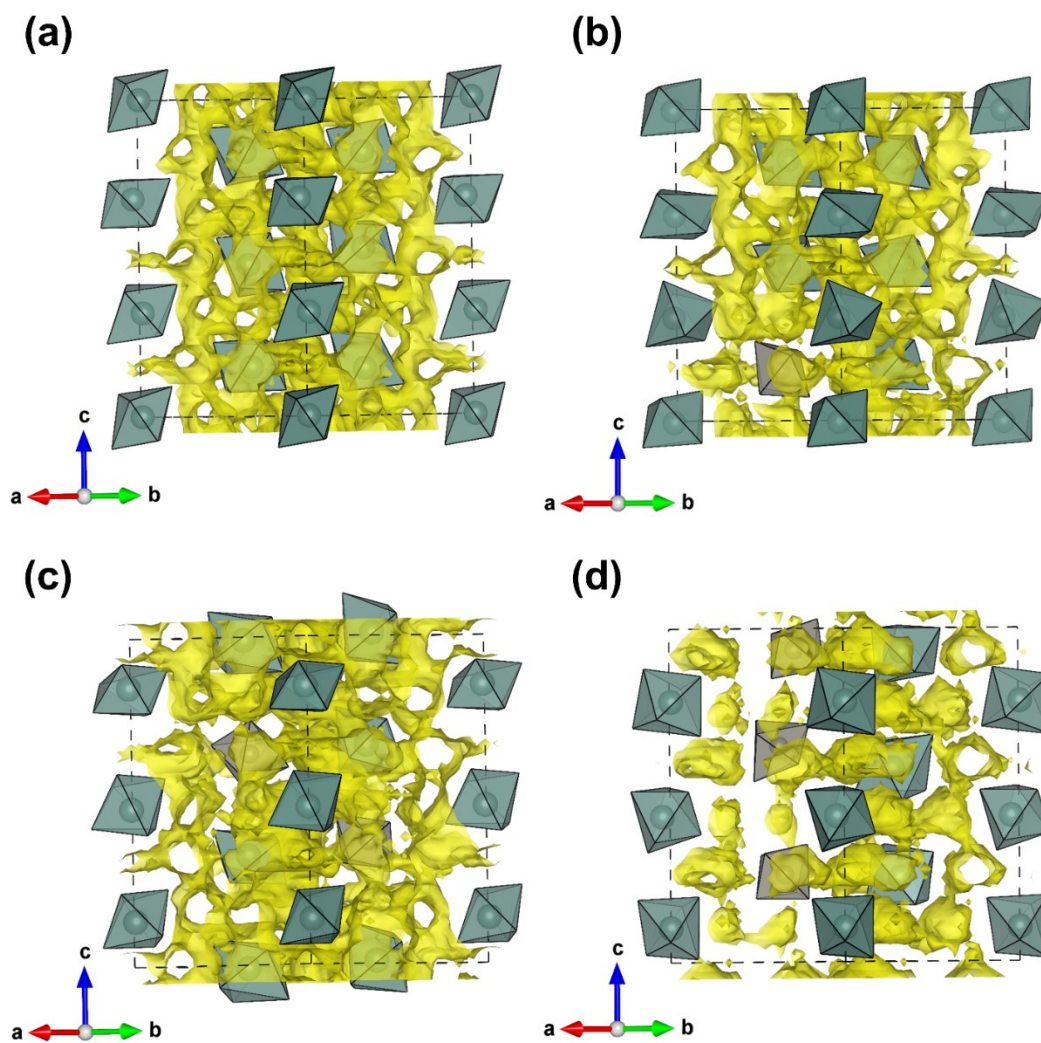

**Fig. S15** The Li<sup>+</sup> probability density at 700K obtained by AIMD simulation (yellow) is superimposed on the anion sublattices of (a) LYC, (b) LYWC1, (c) LYWC3, and (d) LYWC4.

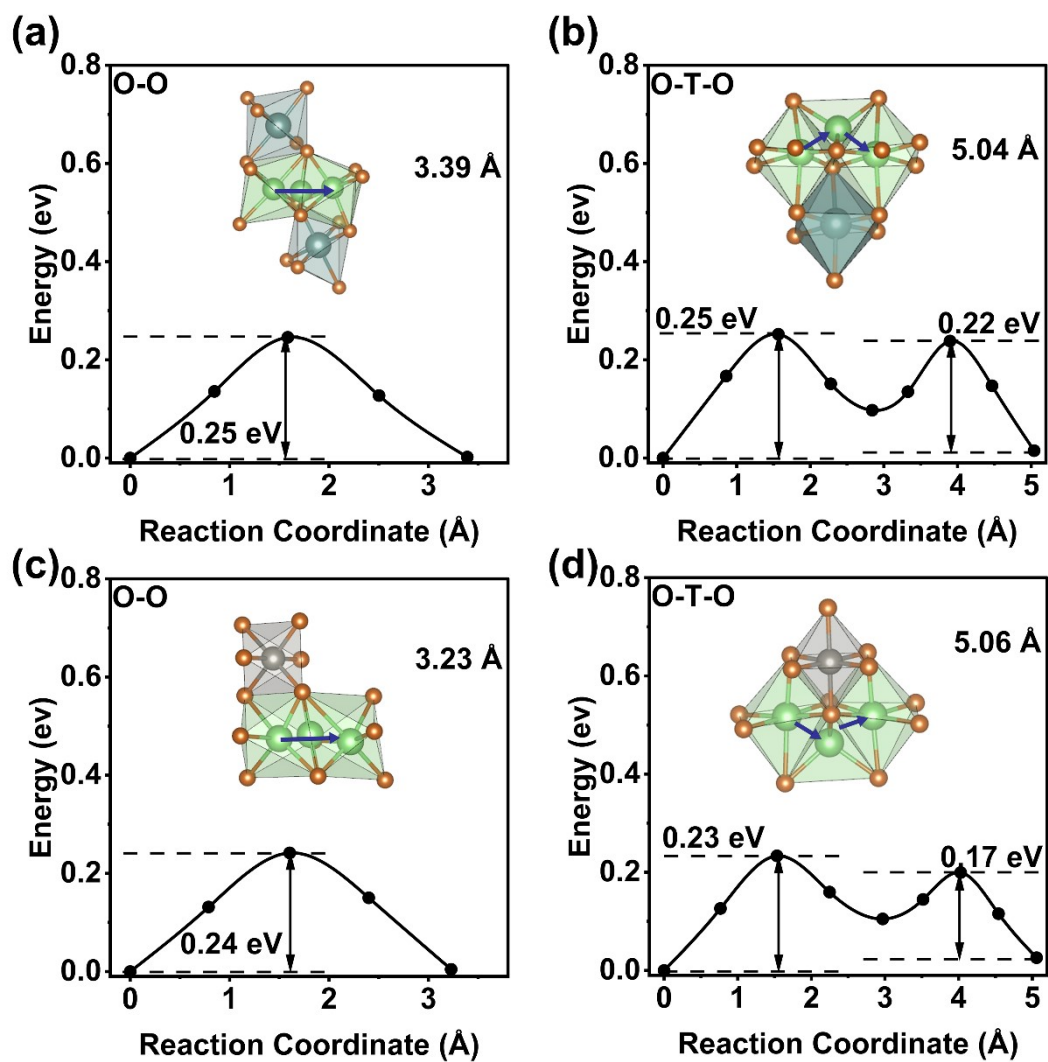

**Fig. S16** Migration energy barrier diagrams with CI-NEB calculations, (a, b) O-O and O-T-O pathways around Y atoms, (c, d) O-O and O-T-O pathways around W atoms in LYWC1.

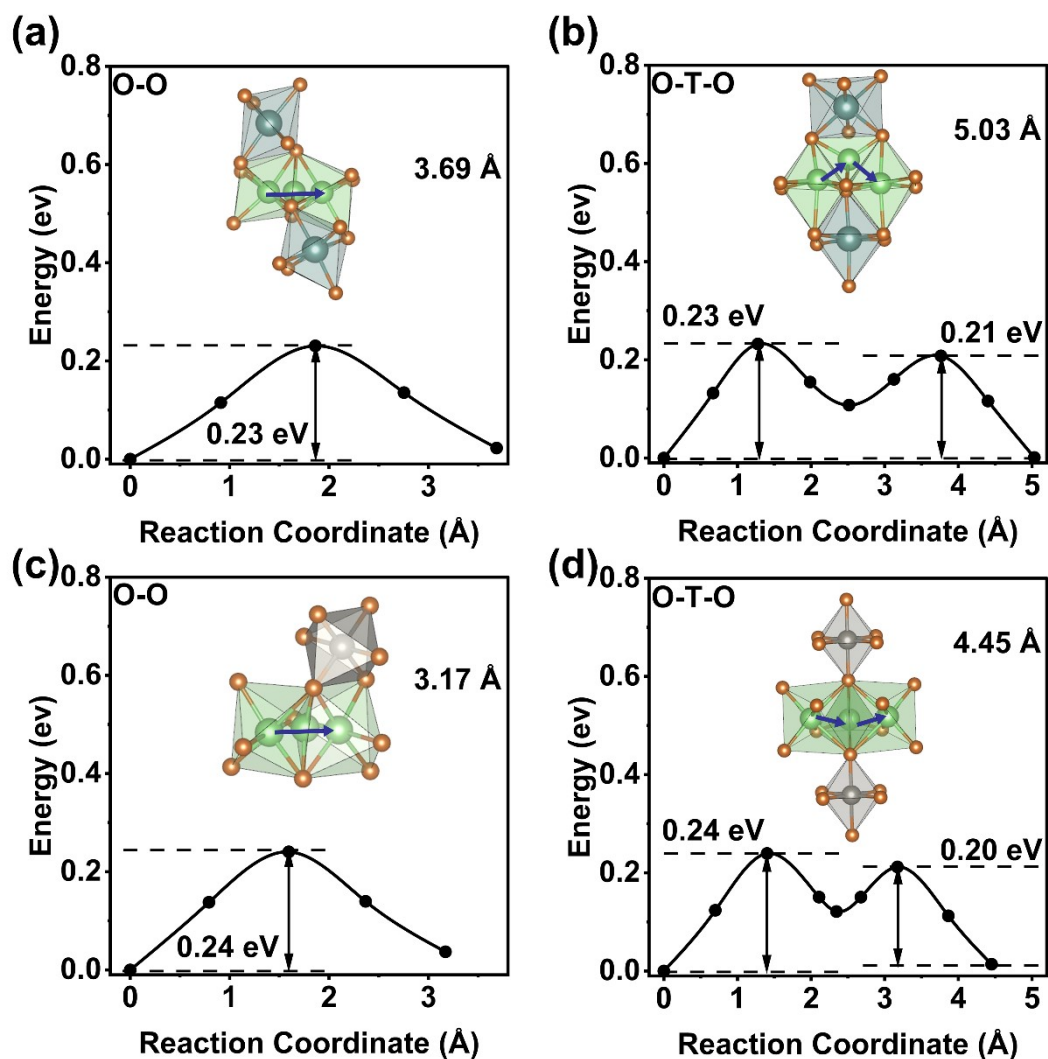

**Fig. S17** Migration energy barrier diagrams with CI-NEB calculations, (a, b) O-O and O-T-O pathways around Y atoms, (c, d) O-O and O-T-O pathways around W atoms in LYWC3.

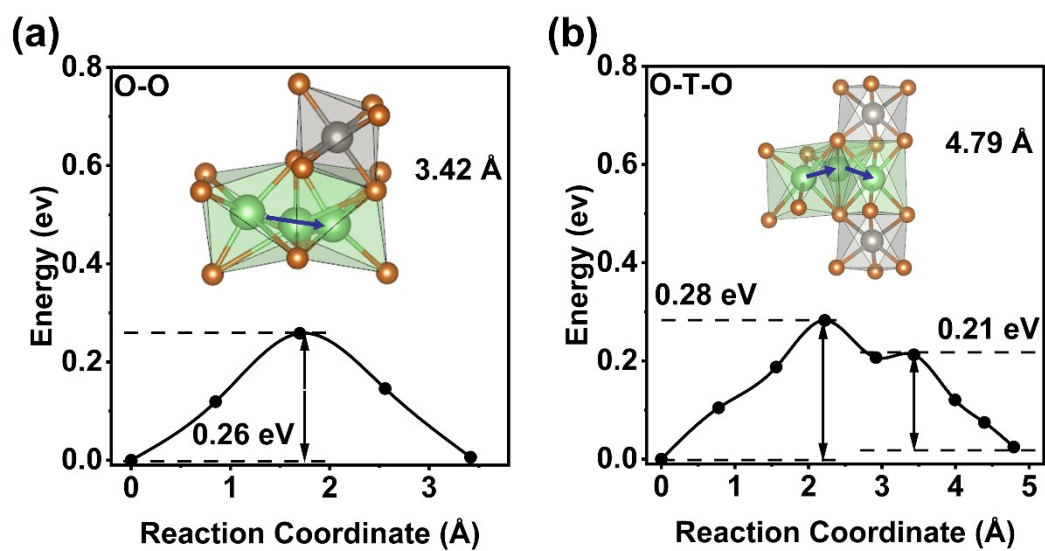

**Fig. S18** Migration energy barrier diagrams with CI-NEB calculations, (a, b) O-O and O-T-O pathways around Y atoms, (c, d) O-O and O-T-O pathways around W atoms in LYWC4.

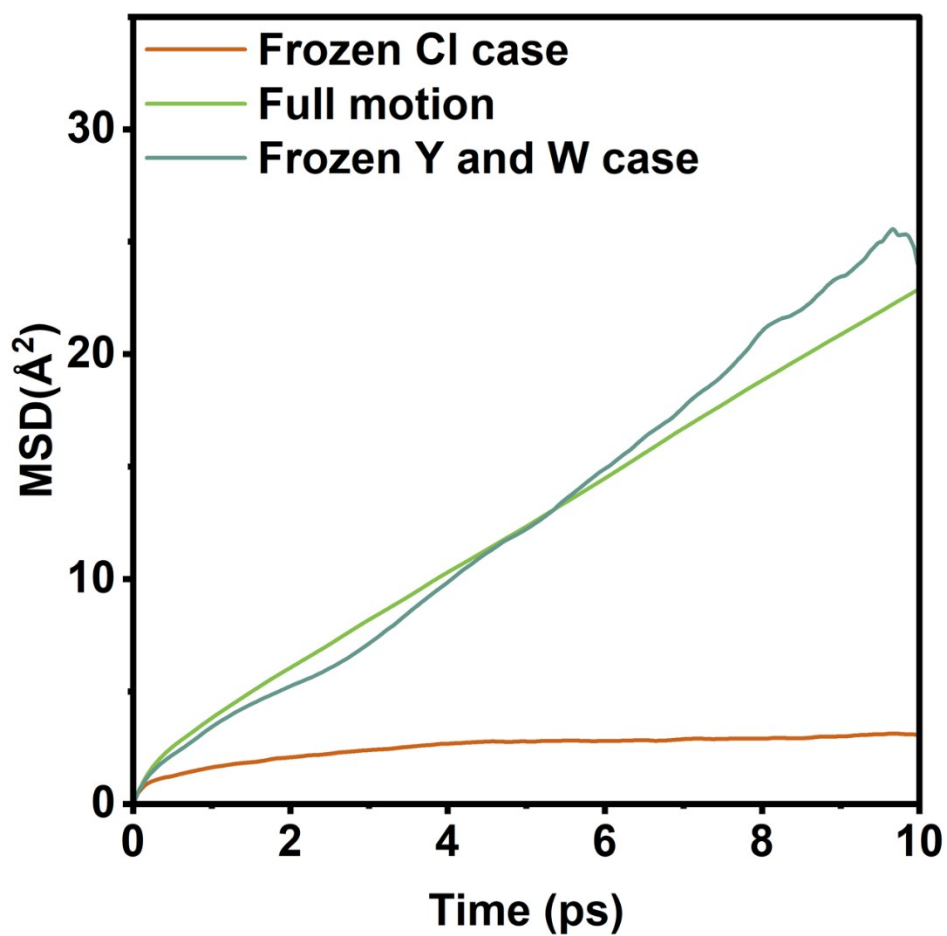

**Fig. S19** mean square displacement (MSD) of  $\text{Li}^+$  in the LYWC2 structure under both full motion and frozen chloride ion framework conditions.

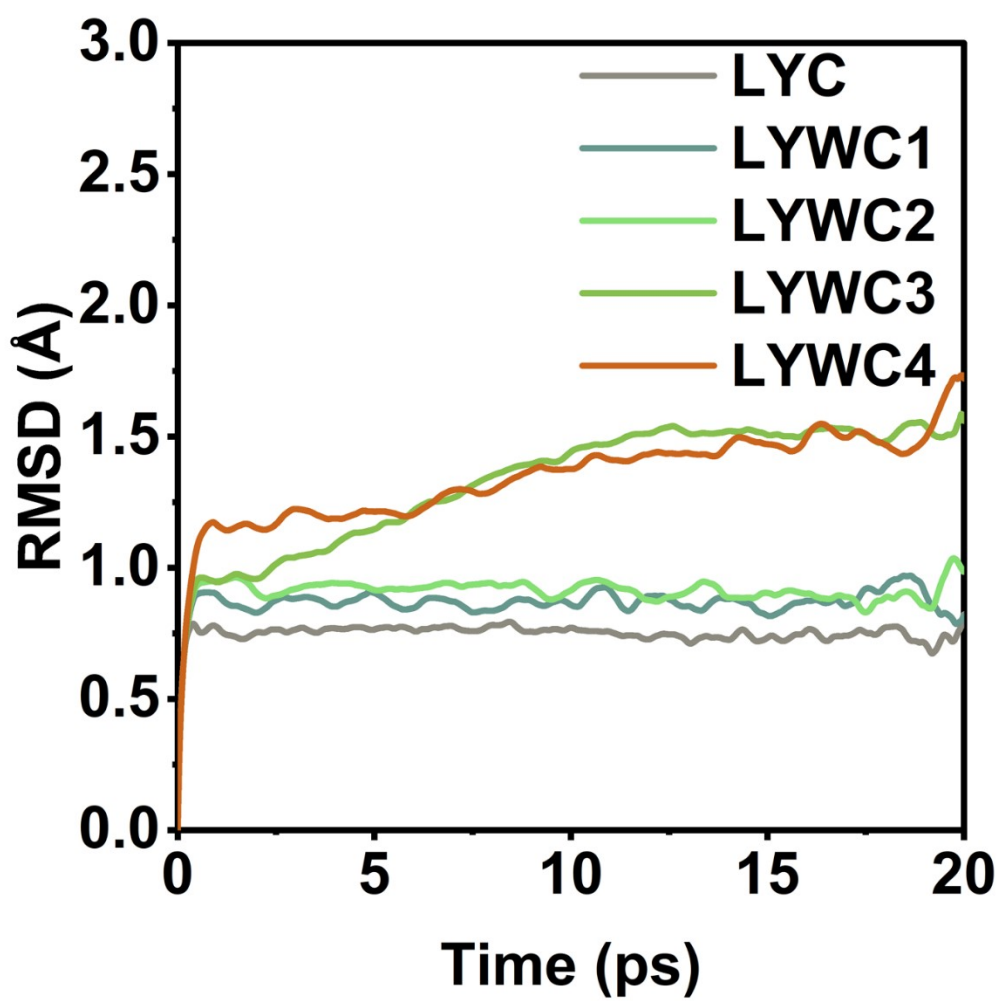

Fig. S20 RMSD of Cl<sup>-</sup> in LYWC at 700 K

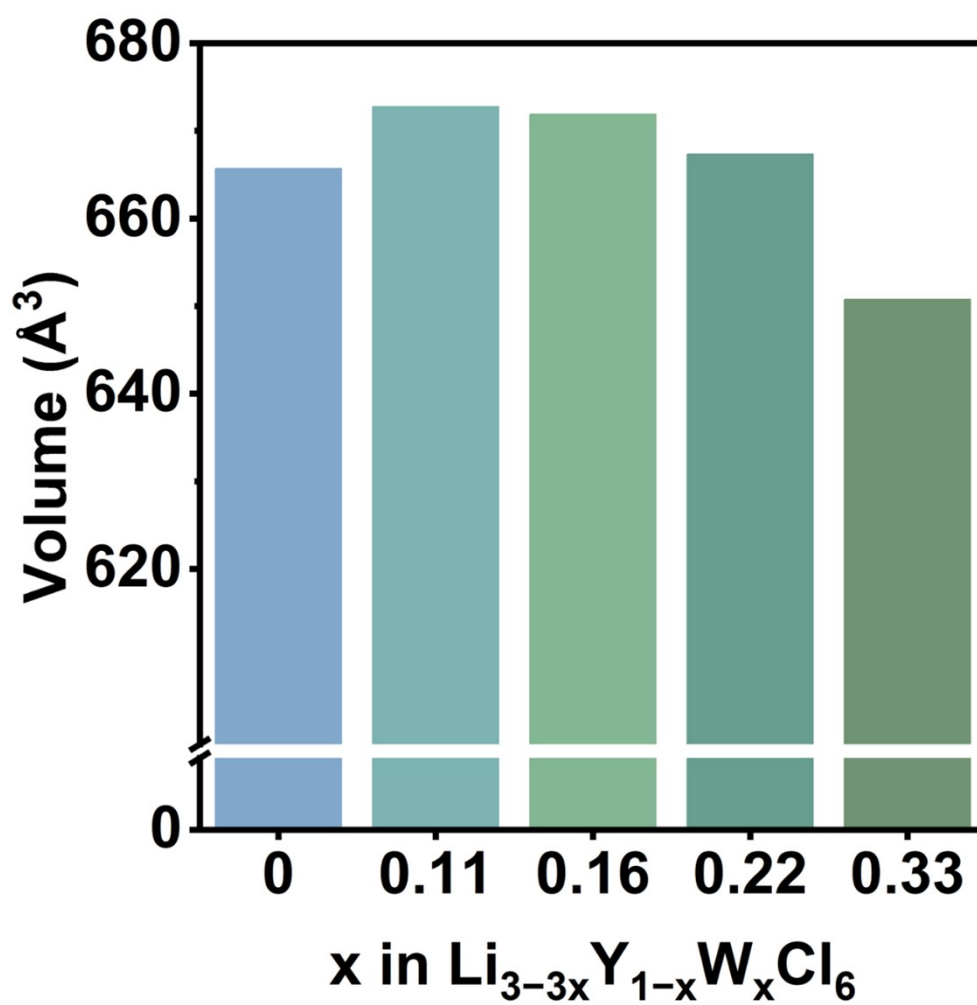

Fig. S21 Variation of unit cell volume with doping concentration in the LYWC structure.

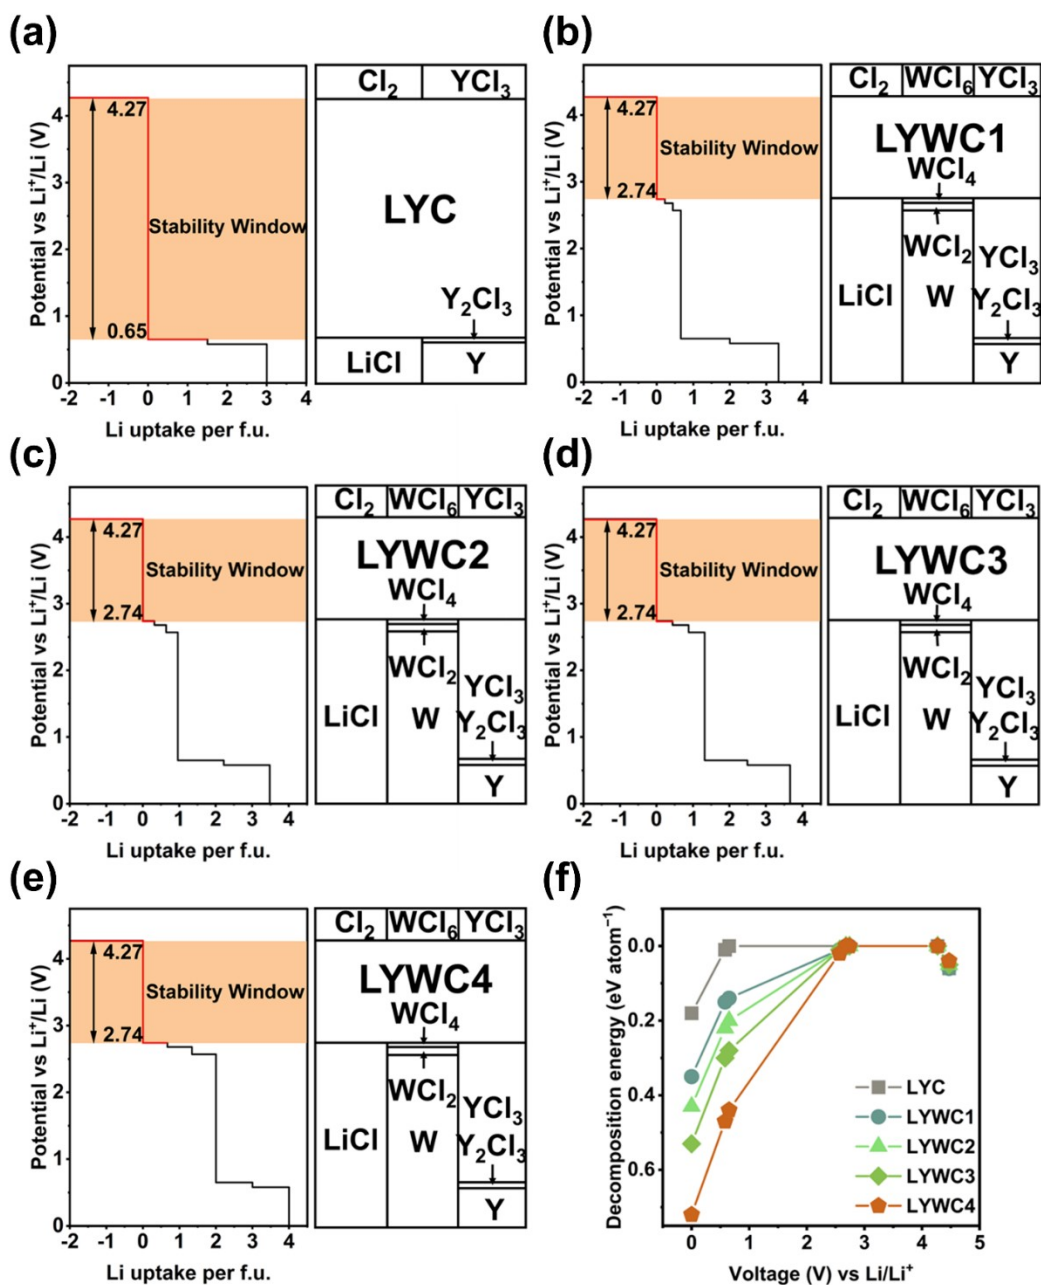

**Fig. S22** The thermodynamic profiles and phase equilibria for (a) LYC (b) LYWC1, (c) LYWC2, (d) LYWC3 and (e) LYWC4. (f) The decomposition energy of LYWC as a function of the chemical potential of  $\text{Li}^+$ .

**Table S1** Values of global maximum pore cavity diameter (GCD), largest cavity diameter (LCD), and pore-limiting diameter (PLD) for LYWC.

| System | GCD (Å) | LCD (Å) | PLD (Å) |
|--------|---------|---------|---------|
| LYC    | 1.14    | 1.04    | 0.54    |
| LYWC1  | 1.25    | 1.25    | 0.57    |
| LYWC2  | 1.25    | 1.14    | 0.58    |
| LYWC3  | 1.20    | 1.13    | 0.61    |
| LYWC4  | 1.11    | 0.80    | 0.65    |

**Table S2** Percolation radius, ionic conductivity of different systems

| System                            | $P_r$ (Å) | $\sigma$ at 300 K (mS cm <sup>-1</sup> ) |
|-----------------------------------|-----------|------------------------------------------|
| Li <sub>3</sub> SmCl <sub>6</sub> | 0.64      | 15.45 <sup>1</sup>                       |
| Li <sub>2</sub> HfCl <sub>6</sub> | 0.51      | 0.50 <sup>2</sup>                        |
| Li <sub>2</sub> ZrCl <sub>6</sub> | 0.51      | 1.00 <sup>2</sup>                        |
| Li <sub>3</sub> InCl <sub>6</sub> | 0.54      | 6.40 <sup>3</sup>                        |
| Li <sub>3</sub> ScCl <sub>6</sub> | 0.56      | 29.00 <sup>4</sup>                       |
| LiSbCl <sub>6</sub>               | 0.71      | 69.70 <sup>5</sup>                       |
| Li <sub>3</sub> YCl <sub>6</sub>  | 0.54      | 13.81                                    |
| LYWC1                             | 0.57      | 17.42                                    |
| LYWC2                             | 0.58      | 20.69                                    |
| LYWC3                             | 0.61      | 10.67                                    |
| LYWC4                             | 0.65      | 0.02                                     |

**Table S3** Inradius of  $[\text{LiCl}_6]$  with different doping structures

| Composition | Diffusion paths (Å) |              |              |              |
|-------------|---------------------|--------------|--------------|--------------|
|             | O-O                 |              | O-T-O        |              |
|             | Around the Y        | Around the W | Around the Y | Around the W |
| LYC         | 2.18                | /            | 0.78         | /            |
| LYWC1       | 2.21                | 2.17         | 0.79         | 0.82         |
| LYWC2       | 2.23                | 2.23         | 0.81         | 0.82         |
| LYWC3       | 2.22                | 2.22         | 0.79         | 0.78         |
| LYWC4       | /                   | 2.16         | /            | 0.74         |

**Table S4** Ionic conductivity, phonon band center, and bulk modulus of different systems

| System                                   | phonon band center<br>(THz) | bulk modulus<br>(GPa) | $\sigma$ at 300 K ( $\text{mS cm}^{-1}$ ) |
|------------------------------------------|-----------------------------|-----------------------|-------------------------------------------|
| $\text{Li}_3\text{InCl}_6$               | /                           | 16.13 <sup>6</sup>    | 6.40 <sup>3</sup>                         |
| $\text{Li}_3\text{ScCl}_6$               | /                           | 17.85 <sup>6</sup>    | 29.00 <sup>4</sup>                        |
| $\text{Li}_3\text{YCl}_6$                | 5.11                        | 21.20                 | 13.81                                     |
| LYWC1                                    | 5.04                        | 17.49                 | 17.42                                     |
| LYWC2                                    | 4.96                        | 15.66                 | 20.69                                     |
| LYWC3                                    | 5.00                        | 15.53                 | 10.67                                     |
| LYWC4                                    | 5.82                        | 18.34                 | 0.02                                      |
| $\text{Li}_3\text{ErBr}_6$               | /                           | 11.53 <sup>6</sup>    | 1.00 <sup>7</sup>                         |
| $\text{LiNbOCl}_4$                       | /                           | 22.70 <sup>8</sup>    | 17.40 <sup>8</sup>                        |
| $\text{Li}_6\text{PS}_5\text{Cl}$        | /                           | 28.00 <sup>9</sup>    | 2.59 <sup>10</sup>                        |
| $\text{Li}_{10}\text{Ge}(\text{PS}_6)_2$ | /                           | 25.00 <sup>9</sup>    | 12.00 <sup>11</sup>                       |

**Table S5** Chemical reactions, decomposition phases, and decomposition energy ( $E_D$ ), between LYWC, sulfides ( $\text{Li}_3\text{PS}_4$ ,  $\text{Li}_{10}\text{Ge}(\text{PS}_6)_2$ , and  $\text{Li}_6\text{PS}_5\text{Cl}$ ), and cathode materials ( $\text{LiFePO}_4$  (LFP)),

| Cathode | SSE                                      | Reaction equation                                                                                                                                                                                                                   | $E_D$<br>(meV atom <sup>-1</sup> ) |
|---------|------------------------------------------|-------------------------------------------------------------------------------------------------------------------------------------------------------------------------------------------------------------------------------------|------------------------------------|
| LFP     | LYC                                      | $0.3333 \text{ Li}_3\text{YCl}_6 + 0.6667 \text{ LiFePO}_4 \rightarrow 0.3333 \text{ Fe}_2\text{PClO}_4 + 0.3333 \text{ YPO}_4 + 1.667 \text{ LiCl}$                                                                                | -29.00                             |
|         | LYWC1                                    | $0.6403 \text{ LiFePO}_4 + 0.3597 \text{ Li}_{2.67}\text{Y}_{0.89}\text{W}_{0.11}\text{Cl}_6 \rightarrow 0.03957 \text{ WCl}_6 + 0.3201 \text{ YPO}_4 + 0.3201 \text{ Fe}_2\text{PClO}_4 + 1.601 \text{ LiCl}$                      | -28.00                             |
|         | LYWC2                                    | $0.6269 \text{ LiFePO}_4 + 0.3731 \text{ Li}_{2.52}\text{Y}_{0.84}\text{W}_{0.16}\text{Cl}_6 \rightarrow 0.0597 \text{ WCl}_6 + 0.3134 \text{ YPO}_4 + 0.3134 \text{ Fe}_2\text{PClO}_4 + 1.567 \text{ LiCl}$                       | -27.00                             |
|         | LYWC3                                    | $0.6094 \text{ LiFePO}_4 + 0.3906 \text{ Li}_{2.34}\text{Y}_{0.78}\text{W}_{0.22}\text{Cl}_6 \rightarrow 0.08594 \text{ WCl}_6 + 0.3047 \text{ YPO}_4 + 0.3047 \text{ Fe}_2\text{PClO}_4 + 1.523 \text{ LiCl}$                      | -27.00                             |
|         | LYWC4                                    | $0.5726 \text{ LiFePO}_4 + 0.4274 \text{ Li}_{2.01}\text{Y}_{0.67}\text{W}_{0.33}\text{Cl}_6 \rightarrow 0.141 \text{ WCl}_6 + 0.2863 \text{ YPO}_4 + 0.2863 \text{ Fe}_2\text{PClO}_4 + 1.432 \text{ LiCl}$                        | -25.00                             |
|         | $\text{Li}_3\text{PS}_4$                 | $0.3 \text{ Li}_3\text{PS}_4 + 0.7 \text{ LiFePO}_4 \rightarrow 0.4 \text{ Li}_4\text{P}_2\text{O}_7 + 0.2 \text{ FePS} + 0.5 \text{ FeS}_2$                                                                                        | -85.00                             |
|         | $\text{Li}_{10}\text{Ge}(\text{PS}_6)_2$ | $0.1463 \text{ Li}_{10}\text{Ge}(\text{PS}_6)_2 + 0.8537 \text{ LiFePO}_4 \rightarrow 0.1951 \text{ Li}_4\text{P}_2\text{O}_7 + 0.5122 \text{ Li}_3\text{PO}_4 + 0.2439 \text{ FePS} + 0.1463 \text{ GeS}_2 + 0.6098 \text{ FeS}_2$ | -101.00                            |
|         | $\text{Li}_6\text{PS}_5\text{Cl}$        | $0.2857 \text{ Li}_6\text{PS}_5\text{Cl} + 0.7143 \text{ LiFePO}_4 \rightarrow 0.1818 \text{ FePS} + 0.02597 \text{ P}_4\text{S}_7 + 0.7143 \text{ Li}_3\text{PO}_4 + 0.5325 \text{ FeS}_2 + 0.2857 \text{ LiCl}$                   | -136.00                            |

**Table S6** Chemical reactions, decomposition phases, and decomposition energy ( $E_D$ ), between LYWC, sulfides ( $\text{Li}_3\text{PS}_4$ ,  $\text{Li}_{10}\text{Ge}(\text{PS}_6)_2$ , and  $\text{Li}_6\text{PS}_5\text{Cl}$ ), and four cathode materials  $\text{LiMn}_2\text{O}_4$  (LMO).

| Cathode | SSE                                      | Reaction equation                                                                                                                                                                           | $E_D$<br>(meV atom <sup>-1</sup> ) |
|---------|------------------------------------------|---------------------------------------------------------------------------------------------------------------------------------------------------------------------------------------------|------------------------------------|
|         |                                          | $0.2857 \text{Li}_3\text{YCl}_6 + 0.7143 \text{LiMn}_2\text{O}_4 \rightarrow 0.2857$                                                                                                        |                                    |
|         | LYC                                      | $\text{YMn}_2\text{O}_5 + 0.04762 \text{Mn}_8\text{Cl}_3\text{O}_{10} + 0.4762 \text{MnO}_2$<br>$+ 1.571 \text{LiCl}$                                                                       | -15.00                             |
|         |                                          | $0.7312 \text{LiMn}_2\text{O}_4 + 0.2688 \text{Li}_{2.67}\text{Y}_{0.89}\text{W}_{0.11}\text{Cl}_6 \rightarrow$                                                                             |                                    |
|         | LYWC1                                    | $0.2392 \text{YMn}_2\text{O}_5 + 0.05466 \text{Mn}_8\text{Cl}_3\text{O}_{10} +$<br>$0.5466 \text{MnO}_2 + 0.02957 \text{WO}_3 + 1.449 \text{LiCl}$                                          | -15.00                             |
|         |                                          | $0.7382 \text{LiMn}_2\text{O}_4 + 0.2618 \text{Li}_{2.52}\text{Y}_{0.84}\text{W}_{0.16}\text{Cl}_6 \rightarrow$                                                                             |                                    |
|         | LYWC2                                    | $0.2199 \text{YMn}_2\text{O}_5 + 0.05759 \text{Mn}_8\text{Cl}_3\text{O}_{10} +$<br>$0.5759 \text{MnO}_2 + 0.04188 \text{WO}_3 + 1.398 \text{LiCl}$                                          | -15.00                             |
|         |                                          | $0.7462 \text{LiMn}_2\text{O}_4 + 0.2538 \text{Li}_{2.34}\text{Y}_{0.78}\text{W}_{0.22}\text{Cl}_6 \rightarrow$                                                                             |                                    |
| LMO     | LYWC3                                    | $0.198 \text{YMn}_2\text{O}_5 + 0.06091 \text{Mn}_8\text{Cl}_3\text{O}_{10} + 0.6091$<br>$\text{MnO}_2 + 0.05584 \text{WO}_3 + 1.34 \text{LiCl}$                                            | -15.00                             |
|         |                                          | $0.7596 \text{LiMn}_2\text{O}_4 + 0.2404 \text{Li}_{2.01}\text{Y}_{0.67}\text{W}_{0.33}\text{Cl}_6 \rightarrow$                                                                             |                                    |
|         | LYWC4                                    | $0.1611 \text{YMn}_2\text{O}_5 + 0.06651 \text{Mn}_8\text{Cl}_3\text{O}_{10} +$<br>$0.6651 \text{MnO}_2 + 0.07933 \text{WO}_3 + 1.243 \text{LiCl}$                                          | -15.00                             |
|         | $\text{Li}_3\text{PS}_4$                 | $0.5 \text{Li}_3\text{PS}_4 + 0.5 \text{LiMn}_2\text{O}_4 \rightarrow 0.5 \text{Li}_3\text{PO}_4 + 0.5$<br>$\text{Li}(\text{MnS}_2)_2$                                                      | -347.00                            |
|         |                                          | $0.3333 \text{Li}_{10}\text{Ge}(\text{PS}_6)_2 + 0.6667 \text{LiMn}_2\text{O}_4 \rightarrow$                                                                                                |                                    |
|         | $\text{Li}_{10}\text{Ge}(\text{PS}_6)_2$ | $0.3333 \text{Li}_4\text{GeS}_4 + 0.6667 \text{Li}(\text{MnS}_2)_2 + 0.6667$<br>$\text{Li}_3\text{PO}_4$                                                                                    | -280.00                            |
|         |                                          | $0.5 \text{Li}_6\text{PS}_5\text{Cl} + 0.5 \text{LiMn}_2\text{O}_4 \rightarrow 0.5 \text{Li}_3\text{PO}_4 + 0.5$<br>$\text{Li}(\text{MnS}_2)_2 + 0.5 \text{Li}_2\text{S} + 0.5 \text{LiCl}$ | -316.00                            |

**Table S7** Chemical reactions, decomposition phases, and decomposition energy ( $E_D$ ), between LYWC, sulfides ( $\text{Li}_3\text{PS}_4$ ,  $\text{Li}_{10}\text{Ge}(\text{PS}_6)_2$ , and  $\text{Li}_6\text{PS}_5\text{Cl}$ ), and cathode materials  $\text{Li}(\text{NiMnCo})_{1/3}\text{O}_2$  (NCM).

| Cathode | SSE                                      | Reaction equation                                                                                                                                                                                                                                                                                                                                                                                          | $E_D$<br>(meV atom <sup>-1</sup> ) |
|---------|------------------------------------------|------------------------------------------------------------------------------------------------------------------------------------------------------------------------------------------------------------------------------------------------------------------------------------------------------------------------------------------------------------------------------------------------------------|------------------------------------|
|         | LYC                                      | $0.5215 \text{ Li}_3\text{MnCoNiO}_6 + 0.4785 \text{ Li}_3\text{YCl}_6 \rightarrow$<br>$0.07975 \text{ Mn}(\text{Ni}_3\text{O}_4)_2 + 0.04294 \text{ Li}_2\text{Mn}_3\text{NiO}_8 +$<br>$0.1043 \text{ Li}_4\text{MnCo}_5\text{O}_{12} + 0.3742 \text{ YClO} + 0.1043$<br>$\text{YMn}_2\text{O}_5 + 2.497 \text{ LiCl}$                                                                                    | -43.00                             |
|         | LYWC1                                    | $0.5917 \text{ Li}_3\text{MnCoNiO}_6 + 0.4083$<br>$\text{Li}_{2.67}\text{Y}_{0.89}\text{W}_{0.11}\text{Cl}_6 \rightarrow 0.04873 \text{ Li}_2\text{Mn}_3\text{NiO}_8 +$<br>$0.1183 \text{ Li}_4\text{MnCo}_5\text{O}_{12} + 0.0905 \text{ Mn}(\text{Ni}_3\text{O}_4)_2 +$<br>$0.04491 \text{ Y}_2\text{WO}_6 + 0.1183 \text{ YMn}_2\text{O}_5 + 0.1552$<br>$\text{YClO} + 2.294 \text{ LiCl}$              | -50.00                             |
|         | LYWC2                                    | $0.6173 \text{ Li}_3\text{MnCoNiO}_6 + 0.3827$<br>$\text{Li}_{2.52}\text{Y}_{0.84}\text{W}_{0.16}\text{Cl}_6 \rightarrow 0.05083 \text{ Li}_2\text{Mn}_3\text{NiO}_8 +$<br>$0.1235 \text{ Li}_4\text{MnCo}_5\text{O}_{12} + 0.09441 \text{ Mn}(\text{Ni}_3\text{O}_4)_2 +$<br>$0.06124 \text{ Y}_2\text{WO}_6 + 0.1235 \text{ YMn}_2\text{O}_5 + 0.07556$<br>$\text{YClO} + 2.221 \text{ LiCl}$            | -53.00                             |
| NCM     | LYWC3                                    | $0.6437 \text{ Li}_3\text{MnCoNiO}_6 + 0.3563$<br>$\text{Li}_{2.34}\text{Y}_{0.78}\text{W}_{0.22}\text{Cl}_6 \rightarrow 0.05685 \text{ Li}_2\text{Mn}_3\text{NiO}_8 +$<br>$0.1283 \text{ Li}_4\text{MnCo}_5\text{O}_{12} + 0.0978 \text{ Mn}(\text{Ni}_3\text{O}_4)_2 +$<br>$0.002366 \text{ Mn}_2\text{CoO}_4 + 0.0784 \text{ Y}_2\text{WO}_6 + 0.1212$<br>$\text{YMn}_2\text{O}_5 + 2.138 \text{ LiCl}$ | -56.00                             |
|         | LYWC4                                    | $0.5345 \text{ Li}_3\text{MnCoNiO}_6 + 0.4655$<br>$\text{Li}_{2.01}\text{Y}_{0.67}\text{W}_{0.33}\text{Cl}_6 \rightarrow 0.07126 \text{ Li}_2\text{Mn}_3\text{NiO}_8 +$<br>$0.1069 \text{ Li}_4\text{MnCo}_5\text{O}_{12} + 0.05112 \text{ NiWO}_4 +$<br>$0.1025 \text{ Y}_2\text{WO}_6 + 0.1069 \text{ YMn}_2\text{O}_5 + 0.4121$<br>$\text{NiCl}_2 + 1.969 \text{ LiCl}$                                 | -61.00                             |
|         | $\text{Li}_3\text{PS}_4$                 | $0.6 \text{ Li}_3\text{PS}_4 + 0.4 \text{ Li}_3\text{MnCoNiO}_6 \rightarrow 0.6 \text{ Li}_3\text{PO}_4 +$<br>$0.1333 \text{ Li}(\text{MnS}_2)_2 + 0.1333 \text{ Co}(\text{NiS}_2)_2 + 0.1333$<br>$\text{Co}_2\text{NiS}_4 + 0.1333 \text{ MnS}_2 + 0.5333 \text{ Li}_2\text{S}$                                                                                                                           | -407.00                            |
|         | $\text{Li}_{10}\text{Ge}(\text{PS}_6)_2$ | $0.317 \text{ Li}_{10}\text{Ge}(\text{PS}_6)_2 + 0.683 \text{ Li}_3\text{MnCoNiO}_6 \rightarrow$<br>$0.317 \text{ Li}_2\text{MnGeO}_4 + 0.2277 \text{ Co}(\text{NiS}_2)_2 + 0.6339$                                                                                                                                                                                                                        | -344.00                            |

|  |                                                                                                                                                                                                                                                                                                                                                                                                                                                            |         |
|--|------------------------------------------------------------------------------------------------------------------------------------------------------------------------------------------------------------------------------------------------------------------------------------------------------------------------------------------------------------------------------------------------------------------------------------------------------------|---------|
|  | $\text{Li}_3\text{PO}_4 + 0.183 \text{Li}(\text{MnS}_2)_2 + 0.07366 \text{Li}_2\text{SO}_4 +$ $0.2277 \text{Co}_2\text{NiS}_4 + 1.176 \text{Li}_2\text{S}$ $0.4 \text{Li}_3\text{MnCoNiO}_6 + 0.6 \text{Li}_6\text{PS}_5\text{Cl} \rightarrow 0.1333$ $\text{Co}_2\text{NiS}_4 + 0.1333 \text{Li}(\text{MnS}_2)_2 + 0.1333 \text{Co}(\text{NiS}_2)_2$ $+ 0.1333 \text{MnS}_2 + 1.133 \text{Li}_2\text{S} + 0.6 \text{LiCl} + 0.6$ $\text{Li}_3\text{PO}_4$ | -364.00 |
|--|------------------------------------------------------------------------------------------------------------------------------------------------------------------------------------------------------------------------------------------------------------------------------------------------------------------------------------------------------------------------------------------------------------------------------------------------------------|---------|

**Table S8** Chemical reactions, decomposition phases, and decomposition energy ( $E_D$ ), between LYWC, sulfides ( $\text{Li}_3\text{PS}_4$ ,  $\text{Li}_{10}\text{Ge}(\text{PS}_6)_2$ , and  $\text{Li}_6\text{PS}_5\text{Cl}$ ), and cathode materials  $\text{LiCoO}_2$  (LCO).

| Cathode | SSE                                      | Reaction equation                                                                                                                                                                                                                                     | $E_D$<br>(meV atom <sup>-1</sup> ) |
|---------|------------------------------------------|-------------------------------------------------------------------------------------------------------------------------------------------------------------------------------------------------------------------------------------------------------|------------------------------------|
|         | LYC                                      | $0.2857 \text{Li}_3\text{YCl}_6 + 0.7143 \text{LiCoO}_2 \rightarrow 0.1429$ $\text{Li}(\text{CoO}_2)_2 + 0.2857 \text{YClO} + 0.1429 \text{Co}_3\text{O}_4 +$ $1.429 \text{LiCl}$                                                                     | -23.00                             |
|         | LYWC1                                    | $0.7688 \text{LiCoO}_2 + 0.2312 \text{Li}_{2.67}\text{Y}_{0.89}\text{W}_{0.11}\text{Cl}_6 \rightarrow$ $0.1538 \text{Li}(\text{CoO}_2)_2 + 0.02543 \text{Y}_2\text{WO}_6 + 0.1538$ $\text{Co}_3\text{O}_4 + 1.232 \text{LiCl} + 0.1549 \text{YClO}$   | -29.00                             |
|         | LYWC2                                    | $0.7872 \text{LiCoO}_2 + 0.2128 \text{Li}_{2.52}\text{Y}_{0.84}\text{W}_{0.16}\text{Cl}_6 \rightarrow$ $0.1574 \text{Li}(\text{CoO}_2)_2 + 0.03404 \text{Y}_2\text{WO}_6 + 0.1574$ $\text{Co}_3\text{O}_4 + 1.166 \text{LiCl} + 0.1106 \text{YClO}$   | -31.00                             |
| LCO     | LYWC3                                    | $0.8058 \text{LiCoO}_2 + 0.1942 \text{Li}_{2.34}\text{Y}_{0.78}\text{W}_{0.22}\text{Cl}_6 \rightarrow$ $0.1612 \text{Li}(\text{CoO}_2)_2 + 0.04272 \text{Y}_2\text{WO}_6 + 0.1612$ $\text{Co}_3\text{O}_4 + 1.099 \text{LiCl} + 0.06602 \text{YClO}$  | -34.00                             |
|         | LYWC4                                    | $0.8326 \text{LiCoO}_2 + 0.1674 \text{Li}_{2.01}\text{Y}_{0.67}\text{W}_{0.33}\text{Cl}_6 \rightarrow$ $0.1665 \text{Li}(\text{CoO}_2)_2 + 0.05523 \text{Y}_2\text{WO}_6 + 0.1665$ $\text{Co}_3\text{O}_4 + 1.003 \text{LiCl} + 0.001674 \text{YClO}$ | -37.00                             |
|         | $\text{Li}_3\text{PS}_4$                 | $0.3143 \text{Li}_3\text{PS}_4 + 0.6857 \text{LiCoO}_2 \rightarrow 0.3143$ $\text{Li}_3\text{PO}_4 + 0.02857 \text{Li}_2\text{SO}_4 + 0.2286 \text{Co}_3\text{S}_4 +$ $0.3143 \text{Li}_2\text{S}$                                                    | -385.00                            |
|         | $\text{Li}_{10}\text{Ge}(\text{PS}_6)_2$ | $0.1037 \text{Li}_{10}\text{Ge}(\text{PS}_6)_2 + 0.8963 \text{LiCoO}_2 \rightarrow$ $0.1037 \text{Li}_4\text{GeO}_4 + 0.09959 \text{Co}_9\text{S}_8 + 0.2075$                                                                                         | -325.00                            |

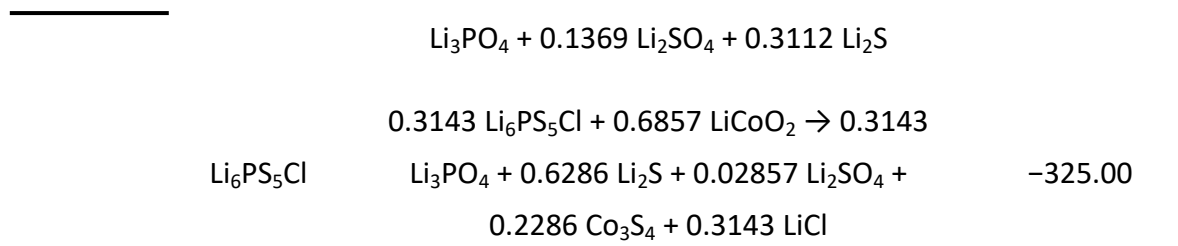

**Table S9** Structure parameters of  $\text{Li}_3\text{YCl}_6$ .

Space group:  $P321$

$a = b = 11.1867 \text{ \AA}$ ,  $c = 6.1423 \text{ \AA}$ .

| Atom | Wyckoff position | Atomic coordinates |         |          |
|------|------------------|--------------------|---------|----------|
|      |                  | x                  | y       | z        |
| Cl1  | 6g               | 0.11460            | 0.88281 | 0.77312  |
| Cl7  | 6g               | 0.10682            | 0.56058 | 0.75463  |
| Cl13 | 6g               | 0.21150            | 0.77178 | 0.26715  |
| Li1  | 3f               | 0.00000            | 0.67843 | 0.50000  |
| Li4  | 3e               | 0.00000            | 0.66117 | -0.00000 |
| Li7  | 3e               | 0.65725            | 0.65725 | -0.00000 |
| Y1   | 2d               | 0.33333            | 0.66667 | 0.50888  |
| Y3   | 1a               | 0.00000            | 0.00000 | 0.00000  |

**Table S10** Structure parameters of  $\text{Li}_{2.67}\text{Y}_{0.89}\text{W}_{0.11}\text{Cl}_6$ .

Space group:  $P3$

$a = b = 11.2469 \text{ \AA}$ ,  $c = 18.4231 \text{ \AA}$ .

| Atom | Wyckoff position | Atomic coordinates |         |          |
|------|------------------|--------------------|---------|----------|
|      |                  | x                  | y       | z        |
| Cl1  | 3d               | 0.12497            | 0.88942 | 0.26076  |
| Cl4  | 3d               | 0.88540            | 0.11840 | 0.74203  |
| Cl7  | 3d               | 0.10988            | 0.87798 | 0.59297  |
| Cl10 | 3d               | 0.00000            | 0.67843 | 0.50000  |
| Cl13 | 3d               | 0.00000            | 0.66117 | -0.00000 |
| Cl16 | 3d               | 0.65725            | 0.65725 | -0.00000 |
| Cl19 | 3d               | 0.33333            | 0.66667 | 0.50888  |
| Cl22 | 3d               | 0.00000            | 0.00000 | 0.00000  |

|      |    |         |         |         |
|------|----|---------|---------|---------|
| Cl25 | 3d | 0.21120 | 0.76859 | 0.76859 |
| Cl28 | 3d | 0.76347 | 0.23624 | 0.22880 |
| Cl31 | 3d | 0.21205 | 0.76911 | 0.76058 |
| Cl34 | 3d | 0.76764 | 0.21069 | 0.57200 |
| Cl37 | 3d | 0.11022 | 0.55350 | 0.25381 |
| Cl40 | 3d | 0.56216 | 0.10645 | 0.74931 |
| Cl43 | 3d | 0.10619 | 0.55508 | 0.59038 |
| Cl46 | 3d | 0.57085 | 0.13981 | 0.08530 |
| Cl49 | 3d | 0.10363 | 0.56436 | 0.92251 |
| Cl52 | 3d | 0.56231 | 0.10850 | 0.40678 |
| Li1  | 3d | 0.99063 | 0.68949 | 0.49625 |
| Li4  | 3d | 0.99571 | 0.67323 | 0.83619 |
| Li7  | 3d | 0.04138 | 0.70015 | 0.01119 |
| Li10 | 3d | 0.03548 | 0.67654 | 0.32908 |
| Li13 | 3d | 0.98162 | 0.65101 | 0.66298 |
| Li16 | 3d | 0.67165 | 0.67278 | 0.98778 |
| Li19 | 3d | 0.64012 | 0.67130 | 0.34494 |
| Li22 | 3d | 0.64460 | 0.66787 | 0.67922 |
| Y1   | 1b | 0.33333 | 0.66667 | 0.16783 |
| Y2   | 1b | 0.33333 | 0.66667 | 0.51343 |
| Y3   | 1b | 0.33333 | 0.66667 | 0.84283 |
| Y4   | 1c | 0.66667 | 0.33333 | 0.83072 |
| Y5   | 1c | 0.66667 | 0.33333 | 0.48980 |
| Y6   | 1a | 0.00000 | 0.00000 | 0.00344 |
| Y7   | 1a | 0.00000 | 0.00000 | 0.32881 |
| Y8   | 1a | 0.00000 | 0.00000 | 0.66764 |
| W1   | 1c | 0.66667 | 0.33333 | 0.15898 |

**Table S11** Structure parameters of  $\text{Li}_{2.52}\text{Y}_{0.84}\text{W}_{0.16}\text{Cl}_6$ .

Space group: *P3*

$a = b = 11.2688 \text{ \AA}$ ,  $c = 12.2188 \text{ \AA}$ .

| Atom | Wyckoff position | Atomic coordinates |         |         |
|------|------------------|--------------------|---------|---------|
|      |                  | x                  | y       | z       |
| Cl1  | 3d               | 0.12701            | 0.89307 | 0.39400 |

|      |    |         |         |         |
|------|----|---------|---------|---------|
| Cl4  | 3d | 0.87489 | 0.11059 | 0.61114 |
| Cl7  | 3d | 0.11150 | 0.88552 | 0.88077 |
| Cl10 | 3d | 0.87844 | 0.11500 | 0.10517 |
| Cl13 | 3d | 0.24303 | 0.79757 | 0.12839 |
| Cl16 | 3d | 0.77482 | 0.22000 | 0.86256 |
| Cl19 | 3d | 0.21491 | 0.77054 | 0.64437 |
| Cl22 | 3d | 0.76327 | 0.23639 | 0.34498 |
| Cl25 | 3d | 0.10990 | 0.55531 | 0.38312 |
| Cl28 | 3d | 0.56294 | 0.10733 | 0.61447 |
| Cl31 | 3d | 0.10161 | 0.56325 | 0.88554 |
| Cl34 | 3d | 0.57111 | 0.14024 | 0.12861 |
| Li1  | 3d | 0.98939 | 0.67876 | 0.75125 |
| Li4  | 3d | 0.04436 | 0.70203 | 0.01844 |
| Li7  | 3d | 0.03647 | 0.68024 | 0.49637 |
| Li10 | 3d | 0.67423 | 0.67063 | 0.97963 |
| Li13 | 3d | 0.63976 | 0.66977 | 0.51843 |
| Y1   | 1b | 0.33333 | 0.66667 | 0.25399 |
| Y2   | 1b | 0.33333 | 0.66667 | 0.77172 |
| Y3   | 1c | 0.66667 | 0.33333 | 0.73743 |
| Y4   | 1a | 0.00000 | 0.00000 | 0.00618 |
| Y5   | 1a | 0.00000 | 0.00000 | 0.49932 |
| W1   | 1c | 0.66667 | 0.33333 | 0.23960 |

**Table S12** Structure parameters of  $\text{Li}_{2.34}\text{Y}_{0.78}\text{W}_{0.22}\text{Cl}_6$ .

Space group:  $P321$

$a = b = 11.2941 \text{ \AA}$ ,  $c = 18.1226 \text{ \AA}$ .

| Atom | Wyckoff position | Atomic coordinates |         |         |
|------|------------------|--------------------|---------|---------|
|      |                  | x                  | y       | z       |
| Cl1  | 6g               | 0.11280            | 0.88713 | 0.42065 |
| Cl7  | 6g               | 0.87918            | 0.11178 | 0.90553 |
| Cl13 | 6g               | 0.12436            | 0.88837 | 0.75908 |
| Cl19 | 6g               | 0.23680            | 0.76310 | 0.26495 |
| Cl25 | 6g               | 0.76740            | 0.21193 | 0.07209 |
| Cl31 | 6g               | 0.22293            | 0.77586 | 0.57375 |

|      |    |          |         |         |
|------|----|----------|---------|---------|
| Cl37 | 6g | 0.14017  | 0.57017 | 0.41067 |
| Cl43 | 6g | 0.55861  | 0.10702 | 0.90554 |
| Cl49 | 6g | 0.11209  | 0.55276 | 0.74906 |
| Li1  | 6g | 0.96414  | 0.63861 | 0.17380 |
| Li7  | 6g | 0.67330  | 0.63980 | 0.15845 |
| Li13 | 3e | -0.00000 | 0.70715 | 0.00000 |
| Li16 | 3f | -0.00000 | 0.69329 | 0.50000 |
| Li19 | 3f | 0.69343  | 0.69343 | 0.50000 |
| Y1   | 2d | 0.33333  | 0.66667 | 0.66092 |
| Y3   | 2d | 0.66667  | 0.33333 | 0.98449 |
| Y5   | 2c | 0.00000  | 0.00000 | 0.17251 |
| Y7   | 1b | 0.00000  | 0.00000 | 0.50000 |
| W1   | 2d | 0.33333  | 0.66667 | 0.33715 |

**Table S13** Structure parameters of  $\text{Li}_{2.01}\text{Y}_{0.67}\text{W}_{0.33}\text{Cl}_6$ .

Space group: *P3*

$a = b = 11.0873 \text{ \AA}$ ,  $c = 6.1125 \text{ \AA}$ .

| Atom  | Wyckoff position | Atomic coordinates |         |         |
|-------|------------------|--------------------|---------|---------|
|       |                  | x                  | y       | z       |
| Cl1   | 3d               | 0.15236            | 0.93556 | 0.71424 |
| Cl4   | 3d               | 0.83577            | 0.06753 | 0.17575 |
| Cl7   | 3d               | 0.26721            | 0.81743 | 0.23607 |
| Cl110 | 3d               | 0.76527            | 0.23711 | 0.62991 |
| Cl13  | 3d               | 0.10126            | 0.59606 | 0.70054 |
| Cl16  | 3d               | 0.56494            | 0.13849 | 0.19198 |
| Li1   | 3d               | 0.06864            | 0.75591 | 0.45989 |
| Li4   | 3d               | 0.10781            | 0.75337 | 0.95785 |
| Y1    | 1b               | 0.33333            | 0.66667 | 0.48424 |
| Y2    | 1a               | 1.00000            | 1.00000 | 0.96260 |
| W1    | 1c               | 0.66667            | 0.33333 | 0.40971 |

**Exclusion of the 600 K data point**

For the LYWC4 structure, the Li<sup>+</sup> mean square displacement (MSD) at 600 K did not show long-range diffusion (MSD < 10 Å within 200 ps) (Fig. S15 (e)†), we excluded this data point from the linear fit.

## References

1. Y. Wang, Z. Ren, J. Zhang, S. Lu, C. Hua, H. Yuan, J. Luo, Y. Liu, J. Nai and X. Tao, *Adv. Sci.*, 2024, **11**, 2404213.
2. F. Li, X. Cheng, L. L. Lu, Y. C. Yin, J. D. Luo, G. Lu, Y. F. Meng, H. Mo, T. Tian, J. T. Yang, W. Wen, Z. P. Liu, G. Zhang, C. Shang and H. B. Yao, *Nano Lett.*, 2022, **22**, 2461-2469.
3. X. Li, J. Liang, X. Yang, K. R. Adair, C. Wang, F. Zhao and X. Sun, *Energy Environ. Sci.*, 2020, **13**, 1429-1461.
4. S. Wang, Q. Bai, A. M. Nolan, Y. Liu, S. Gong, Q. Sun and Y. Mo, *Angew. Chem. Int. Ed.*, 2019, **58**, 8039-8043.
5. X. Fu, Y. Wang, J. Xu, Q. Yang, H. Mao, R. Xiao and H. Li, *J. Mater. Chem. A*, 2024, **12**, 10562-10570.
6. Y. Ren, C. Sun, J. Liu, G. Cai, X. Tan and C. Zhang, *Mater. Today Commun.*, 2022, **33**, 104570.
7. X. Shi, Z. Zeng, H. Zhang, Y. Huang, C. H. Yan and Y. Du, *Adv. Funct. Mater.*, 2023, **33**, 2213638.
8. B. Singh, Y. Wang, J. Liu, J. D. Bazak, A. Shyamsunder and L. F. Nazar, *J. Am. Chem. Soc.*, 2024, **146**, 17158-17169.
9. A. Jain, S. P. Ong, G. Hautier, W. Chen, W. D. Richards, S. Dacek, S. Cholia, D. Gunter, D. Skinner, G. Ceder and K. A. Persson, *APL Mater.*, 2013, **1**, 011002.
10. M. Jiang, Z. W. Chen, A. Rao, L. X. Chen, X. T. Zu and C. V. Singh, *J. Mater. Chem. C*, 2022, **10**, 18294-18302.
11. N. Kamaya, K. Homma, Y. Yamakawa, M. Hirayama, R. Kanno, M. Yonemura, T. Kamiyama, Y. Kato, S. Hama, K. Kawamoto and A. Mitsui, *Nat. Mater.*, 2011, **10**, 682-686.
